# Supplementary material for: Community Detection in Airline Networks: An Empirical Analysis of American vs. Southwest Airlines
Source: Hindawi journal article supplement (doi:10.1155/2019/3032015), 2019-12-31
Supplement: f1 [file 3032015.f1.xlsx]

## Sheet: AAL-52airport
OAG ANALYSER
VERSION: 2.0.1. Data load date: 11 Aug 2019
SEARCH ATTRIBUTES/PARAMETERS:
Report Type: Schedules Power Table
Dimensions: [Carrier Code, Carrier Name, Dep Airport Code, Dep Airport Name, Arr Airport Code, Arr Airport Name]
Metrics: [Frequency]
Type of Operation: Published carrier, Operating Flights
Carrier: Included[IATA: AA]
Carrier Category: All
Include alliance affiliates: false
Origin: Airport(s) Included[ABQ,ATL,AUS,BNA,BOI,BOS,BWI,CLE,CLT,CMH,COS,DEN,DFW,DTW,ELP,EUG,EWR,FLL,HNL,HOU,IAD,IAH,IND,JFK,KOA,LAS,LAX,MCI,MCO,MIA,MKE,MSP,MSY,OAK,OGG,ORD,PDX,PHL,PHX,RNO,SAN,SAT,SBA,SBP,SEA,SFO,SJC,SLC,SMF,STL,TUL,TUS]
Destination: Airport(s) Included[ABQ,ATL,AUS,BNA,BOI,BOS,BWI,CLE,CLT,CMH,COS,DEN,DFW,DTW,ELP,EUG,EWR,FLL,HNL,HOU,IAD,IAH,IND,JFK,KOA,LAS,LAX,MCI,MCO,MIA,MKE,MSP,MSY,OAK,OGG,ORD,PDX,PHL,PHX,RNO,SAN,SAT,SBA,SBP,SEA,SFO,SJC,SLC,SMF,STL,TUL,TUS]
Direction: One way
Aggregate route: false
Flight Type: All
Service type: C,G,J,Q,S
Include Surface: false
Non-stop: true
Equipment Group: A,H,J,JN,JW,P,RJ,T,
Period: Month 01Jul2018 to 31Jul2018
TimeSeries: true
MONTHLY DATED AT 8 2019
REPORT DATED AT: Aug 12-2019. TIME: 09:02 (BST)
Carrier Code	Carrier Name	Dep Airport Code	Dep Airport Name	Arr Airport Code	Arr Airport Name	Frequency	Time series
AA	American Airlines	ABQ	Albuquerque	DFW	Dallas Dallas/Fort Worth Intl Apt	236	201807
AA	American Airlines	ABQ	Albuquerque	LAX	Los Angeles International Apt	93	201807
AA	American Airlines	ABQ	Albuquerque	ORD	Chicago O'Hare International Apt	60	201807
AA	American Airlines	ABQ	Albuquerque	PHX	Phoenix Sky Harbor Intl Apt	150	201807
AA	American Airlines	ATL	Atlanta Hartsfield-jackson Intl Apt	CLT	Charlotte	254	201807
AA	American Airlines	ATL	Atlanta Hartsfield-jackson Intl Apt	DFW	Dallas Dallas/Fort Worth Intl Apt	231	201807
AA	American Airlines	ATL	Atlanta Hartsfield-jackson Intl Apt	LAX	Los Angeles International Apt	89	201807
AA	American Airlines	ATL	Atlanta Hartsfield-jackson Intl Apt	MIA	Miami International Apt	213	201807
AA	American Airlines	ATL	Atlanta Hartsfield-jackson Intl Apt	ORD	Chicago O'Hare International Apt	169	201807
AA	American Airlines	ATL	Atlanta Hartsfield-jackson Intl Apt	PHL	Philadelphia International Apt	165	201807
AA	American Airlines	ATL	Atlanta Hartsfield-jackson Intl Apt	PHX	Phoenix Sky Harbor Intl Apt	62	201807
AA	American Airlines	AUS	Austin-Bergstrom International Apt	CLT	Charlotte	153	201807
AA	American Airlines	AUS	Austin-Bergstrom International Apt	DFW	Dallas Dallas/Fort Worth Intl Apt	328	201807
AA	American Airlines	AUS	Austin-Bergstrom International Apt	JFK	New York J F Kennedy International Apt	31	201807
AA	American Airlines	AUS	Austin-Bergstrom International Apt	LAX	Los Angeles International Apt	124	201807
AA	American Airlines	AUS	Austin-Bergstrom International Apt	MIA	Miami International Apt	93	201807
AA	American Airlines	AUS	Austin-Bergstrom International Apt	ORD	Chicago O'Hare International Apt	118	201807
AA	American Airlines	AUS	Austin-Bergstrom International Apt	PHL	Philadelphia International Apt	58	201807
AA	American Airlines	AUS	Austin-Bergstrom International Apt	PHX	Phoenix Sky Harbor Intl Apt	116	201807
AA	American Airlines	BNA	Nashville	CLT	Charlotte	206	201807
AA	American Airlines	BNA	Nashville	DFW	Dallas Dallas/Fort Worth Intl Apt	237	201807
AA	American Airlines	BNA	Nashville	JFK	New York J F Kennedy International Apt	62	201807
AA	American Airlines	BNA	Nashville	LAX	Los Angeles International Apt	62	201807
AA	American Airlines	BNA	Nashville	MIA	Miami International Apt	93	201807
AA	American Airlines	BNA	Nashville	ORD	Chicago O'Hare International Apt	285	201807
AA	American Airlines	BNA	Nashville	PHL	Philadelphia International Apt	164	201807
AA	American Airlines	BOI	Boise	DFW	Dallas Dallas/Fort Worth Intl Apt	60	201807
AA	American Airlines	BOI	Boise	ORD	Chicago O'Hare International Apt	31	201807
AA	American Airlines	BOI	Boise	PHX	Phoenix Sky Harbor Intl Apt	122	201807
AA	American Airlines	BOS	Boston Edward L Logan Intl Apt	CLT	Charlotte	275	201807
AA	American Airlines	BOS	Boston Edward L Logan Intl Apt	DFW	Dallas Dallas/Fort Worth Intl Apt	209	201807
AA	American Airlines	BOS	Boston Edward L Logan Intl Apt	JFK	New York J F Kennedy International Apt	153	201807
AA	American Airlines	BOS	Boston Edward L Logan Intl Apt	LAX	Los Angeles International Apt	182	201807
AA	American Airlines	BOS	Boston Edward L Logan Intl Apt	MIA	Miami International Apt	215	201807
AA	American Airlines	BOS	Boston Edward L Logan Intl Apt	ORD	Chicago O'Hare International Apt	303	201807
AA	American Airlines	BOS	Boston Edward L Logan Intl Apt	PHL	Philadelphia International Apt	329	201807
AA	American Airlines	BOS	Boston Edward L Logan Intl Apt	PHX	Phoenix Sky Harbor Intl Apt	124	201807
AA	American Airlines	BWI	Baltimore Washington International Apt	CLT	Charlotte	208	201807
AA	American Airlines	BWI	Baltimore Washington International Apt	DFW	Dallas Dallas/Fort Worth Intl Apt	120	201807
AA	American Airlines	BWI	Baltimore Washington International Apt	JFK	New York J F Kennedy International Apt	62	201807
AA	American Airlines	BWI	Baltimore Washington International Apt	MIA	Miami International Apt	93	201807
AA	American Airlines	BWI	Baltimore Washington International Apt	ORD	Chicago O'Hare International Apt	117	201807
AA	American Airlines	BWI	Baltimore Washington International Apt	PHL	Philadelphia International Apt	84	201807
AA	American Airlines	BWI	Baltimore Washington International Apt	PHX	Phoenix Sky Harbor Intl Apt	62	201807
AA	American Airlines	CLE	Cleveland Hopkins International Apt	CLT	Charlotte	201	201807
AA	American Airlines	CLE	Cleveland Hopkins International Apt	DFW	Dallas Dallas/Fort Worth Intl Apt	138	201807
AA	American Airlines	CLE	Cleveland Hopkins International Apt	JFK	New York J F Kennedy International Apt	93	201807
AA	American Airlines	CLE	Cleveland Hopkins International Apt	MIA	Miami International Apt	93	201807
AA	American Airlines	CLE	Cleveland Hopkins International Apt	ORD	Chicago O'Hare International Apt	196	201807
AA	American Airlines	CLE	Cleveland Hopkins International Apt	PHL	Philadelphia International Apt	166	201807
AA	American Airlines	CLT	Charlotte	ATL	Atlanta Hartsfield-jackson Intl Apt	248	201807
AA	American Airlines	CLT	Charlotte	AUS	Austin-Bergstrom International Apt	153	201807
AA	American Airlines	CLT	Charlotte	BNA	Nashville	211	201807
AA	American Airlines	CLT	Charlotte	BOS	Boston Edward L Logan Intl Apt	275	201807
AA	American Airlines	CLT	Charlotte	BWI	Baltimore Washington International Apt	209	201807
AA	American Airlines	CLT	Charlotte	CLE	Cleveland Hopkins International Apt	201	201807
AA	American Airlines	CLT	Charlotte	CMH	Columbus John Glenn Intl Apt	235	201807
AA	American Airlines	CLT	Charlotte	DEN	Denver Intl Apt	181	201807
AA	American Airlines	CLT	Charlotte	DFW	Dallas Dallas/Fort Worth Intl Apt	303	201807
AA	American Airlines	CLT	Charlotte	DTW	Detroit Metropolitan Wayne County	209	201807
AA	American Airlines	CLT	Charlotte	EWR	Newark Liberty International Apt	199	201807
AA	American Airlines	CLT	Charlotte	FLL	Fort Lauderdale/Hollywood Intl Apt	187	201807
AA	American Airlines	CLT	Charlotte	IAD	Washington Dulles International Apt	244	201807
AA	American Airlines	CLT	Charlotte	IAH	Houston George Bush Intercont.	175	201807
AA	American Airlines	CLT	Charlotte	IND	Indianapolis	240	201807
AA	American Airlines	CLT	Charlotte	JFK	New York J F Kennedy International Apt	182	201807
AA	American Airlines	CLT	Charlotte	LAS	Las Vegas McCarran International Apt	150	201807
AA	American Airlines	CLT	Charlotte	LAX	Los Angeles International Apt	186	201807
AA	American Airlines	CLT	Charlotte	MCI	Kansas City International Apt	122	201807
AA	American Airlines	CLT	Charlotte	MCO	Orlando International Apt	275	201807
AA	American Airlines	CLT	Charlotte	MIA	Miami International Apt	212	201807
AA	American Airlines	CLT	Charlotte	MKE	Milwaukee General Mitchell Intl Apt	149	201807
AA	American Airlines	CLT	Charlotte	MSP	Minneapolis/St Paul International Apt	112	201807
AA	American Airlines	CLT	Charlotte	MSY	New Orleans Louis Armstrong Intl Apt	213	201807
AA	American Airlines	CLT	Charlotte	ORD	Chicago O'Hare International Apt	277	201807
AA	American Airlines	CLT	Charlotte	PDX	Portland International	58	201807
AA	American Airlines	CLT	Charlotte	PHL	Philadelphia International Apt	266	201807
AA	American Airlines	CLT	Charlotte	PHX	Phoenix Sky Harbor Intl Apt	248	201807
AA	American Airlines	CLT	Charlotte	SAN	San Diego International	91	201807
AA	American Airlines	CLT	Charlotte	SAT	San Antonio International Apt	109	201807
AA	American Airlines	CLT	Charlotte	SEA	Seattle-Tacoma International Apt	121	201807
AA	American Airlines	CLT	Charlotte	SFO	San Francisco	182	201807
AA	American Airlines	CLT	Charlotte	SJC	San Jose Norman Y. Mineta Intl	29	201807
AA	American Airlines	CLT	Charlotte	SLC	Salt Lake City	31	201807
AA	American Airlines	CLT	Charlotte	SMF	Sacramento International Apt	31	201807
AA	American Airlines	CLT	Charlotte	STL	St Louis Lambert Intl Apt	169	201807
AA	American Airlines	CLT	Charlotte	TUL	Tulsa International Apt	62	201807
AA	American Airlines	CLT	Charlotte	TUS	Tucson International Apt	29	201807
AA	American Airlines	CMH	Columbus John Glenn Intl Apt	CLT	Charlotte	236	201807
AA	American Airlines	CMH	Columbus John Glenn Intl Apt	DFW	Dallas Dallas/Fort Worth Intl Apt	147	201807
AA	American Airlines	CMH	Columbus John Glenn Intl Apt	JFK	New York J F Kennedy International Apt	31	201807
AA	American Airlines	CMH	Columbus John Glenn Intl Apt	LAX	Los Angeles International Apt	31	201807
AA	American Airlines	CMH	Columbus John Glenn Intl Apt	MIA	Miami International Apt	92	201807
AA	American Airlines	CMH	Columbus John Glenn Intl Apt	ORD	Chicago O'Hare International Apt	226	201807
AA	American Airlines	CMH	Columbus John Glenn Intl Apt	PHL	Philadelphia International Apt	198	201807
AA	American Airlines	CMH	Columbus John Glenn Intl Apt	PHX	Phoenix Sky Harbor Intl Apt	60	201807
AA	American Airlines	COS	Colorado Springs Municipal	DFW	Dallas Dallas/Fort Worth Intl Apt	146	201807
AA	American Airlines	COS	Colorado Springs Municipal	ORD	Chicago O'Hare International Apt	62	201807
AA	American Airlines	DEN	Denver Intl Apt	CLT	Charlotte	181	201807
AA	American Airlines	DEN	Denver Intl Apt	DFW	Dallas Dallas/Fort Worth Intl Apt	272	201807
AA	American Airlines	DEN	Denver Intl Apt	JFK	New York J F Kennedy International Apt	31	201807
AA	American Airlines	DEN	Denver Intl Apt	LAX	Los Angeles International Apt	91	201807
AA	American Airlines	DEN	Denver Intl Apt	MIA	Miami International Apt	93	201807
AA	American Airlines	DEN	Denver Intl Apt	ORD	Chicago O'Hare International Apt	142	201807
AA	American Airlines	DEN	Denver Intl Apt	PHL	Philadelphia International Apt	85	201807
AA	American Airlines	DEN	Denver Intl Apt	PHX	Phoenix Sky Harbor Intl Apt	119	201807
AA	American Airlines	DFW	Dallas Dallas/Fort Worth Intl Apt	ABQ	Albuquerque	236	201807
AA	American Airlines	DFW	Dallas Dallas/Fort Worth Intl Apt	ATL	Atlanta Hartsfield-jackson Intl Apt	231	201807
AA	American Airlines	DFW	Dallas Dallas/Fort Worth Intl Apt	AUS	Austin-Bergstrom International Apt	328	201807
AA	American Airlines	DFW	Dallas Dallas/Fort Worth Intl Apt	BNA	Nashville	237	201807
AA	American Airlines	DFW	Dallas Dallas/Fort Worth Intl Apt	BOI	Boise	60	201807
AA	American Airlines	DFW	Dallas Dallas/Fort Worth Intl Apt	BOS	Boston Edward L Logan Intl Apt	209	201807
AA	American Airlines	DFW	Dallas Dallas/Fort Worth Intl Apt	BWI	Baltimore Washington International Apt	120	201807
AA	American Airlines	DFW	Dallas Dallas/Fort Worth Intl Apt	CLE	Cleveland Hopkins International Apt	138	201807
AA	American Airlines	DFW	Dallas Dallas/Fort Worth Intl Apt	CLT	Charlotte	303	201807
AA	American Airlines	DFW	Dallas Dallas/Fort Worth Intl Apt	CMH	Columbus John Glenn Intl Apt	147	201807
AA	American Airlines	DFW	Dallas Dallas/Fort Worth Intl Apt	COS	Colorado Springs Municipal	146	201807
AA	American Airlines	DFW	Dallas Dallas/Fort Worth Intl Apt	DEN	Denver Intl Apt	272	201807
AA	American Airlines	DFW	Dallas Dallas/Fort Worth Intl Apt	DTW	Detroit Metropolitan Wayne County	144	201807
AA	American Airlines	DFW	Dallas Dallas/Fort Worth Intl Apt	ELP	El Paso International Apt	262	201807
AA	American Airlines	DFW	Dallas Dallas/Fort Worth Intl Apt	EWR	Newark Liberty International Apt	148	201807
AA	American Airlines	DFW	Dallas Dallas/Fort Worth Intl Apt	FLL	Fort Lauderdale/Hollywood Intl Apt	181	201807
AA	American Airlines	DFW	Dallas Dallas/Fort Worth Intl Apt	HNL	Honolulu	62	201807
AA	American Airlines	DFW	Dallas Dallas/Fort Worth Intl Apt	HOU	Houston William P. Hobby Apt	208	201807
AA	American Airlines	DFW	Dallas Dallas/Fort Worth Intl Apt	IAD	Washington Dulles International Apt	135	201807
AA	American Airlines	DFW	Dallas Dallas/Fort Worth Intl Apt	IAH	Houston George Bush Intercont.	301	201807
AA	American Airlines	DFW	Dallas Dallas/Fort Worth Intl Apt	IND	Indianapolis	146	201807
AA	American Airlines	DFW	Dallas Dallas/Fort Worth Intl Apt	JFK	New York J F Kennedy International Apt	89	201807
AA	American Airlines	DFW	Dallas Dallas/Fort Worth Intl Apt	KOA	Kona	31	201807
AA	American Airlines	DFW	Dallas Dallas/Fort Worth Intl Apt	LAS	Las Vegas McCarran International Apt	324	201807
AA	American Airlines	DFW	Dallas Dallas/Fort Worth Intl Apt	LAX	Los Angeles International Apt	403	201807
AA	American Airlines	DFW	Dallas Dallas/Fort Worth Intl Apt	MCI	Kansas City International Apt	206	201807
AA	American Airlines	DFW	Dallas Dallas/Fort Worth Intl Apt	MCO	Orlando International Apt	271	201807
AA	American Airlines	DFW	Dallas Dallas/Fort Worth Intl Apt	MIA	Miami International Apt	314	201807
AA	American Airlines	DFW	Dallas Dallas/Fort Worth Intl Apt	MKE	Milwaukee General Mitchell Intl Apt	116	201807
AA	American Airlines	DFW	Dallas Dallas/Fort Worth Intl Apt	MSP	Minneapolis/St Paul International Apt	181	201807
AA	American Airlines	DFW	Dallas Dallas/Fort Worth Intl Apt	MSY	New Orleans Louis Armstrong Intl Apt	241	201807
AA	American Airlines	DFW	Dallas Dallas/Fort Worth Intl Apt	OAK	Oakland International Apt	60	201807
AA	American Airlines	DFW	Dallas Dallas/Fort Worth Intl Apt	OGG	Kahului	62	201807
AA	American Airlines	DFW	Dallas Dallas/Fort Worth Intl Apt	ORD	Chicago O'Hare International Apt	399	201807
AA	American Airlines	DFW	Dallas Dallas/Fort Worth Intl Apt	PDX	Portland International	150	201807
AA	American Airlines	DFW	Dallas Dallas/Fort Worth Intl Apt	PHL	Philadelphia International Apt	279	201807
AA	American Airlines	DFW	Dallas Dallas/Fort Worth Intl Apt	PHX	Phoenix Sky Harbor Intl Apt	367	201807
AA	American Airlines	DFW	Dallas Dallas/Fort Worth Intl Apt	RNO	Reno	81	201807
AA	American Airlines	DFW	Dallas Dallas/Fort Worth Intl Apt	SAN	San Diego International	271	201807
AA	American Airlines	DFW	Dallas Dallas/Fort Worth Intl Apt	SAT	San Antonio International Apt	327	201807
AA	American Airlines	DFW	Dallas Dallas/Fort Worth Intl Apt	SBA	Santa Barbara	31	201807
AA	American Airlines	DFW	Dallas Dallas/Fort Worth Intl Apt	SEA	Seattle-Tacoma International Apt	286	201807
AA	American Airlines	DFW	Dallas Dallas/Fort Worth Intl Apt	SFO	San Francisco	271	201807
AA	American Airlines	DFW	Dallas Dallas/Fort Worth Intl Apt	SJC	San Jose Norman Y. Mineta Intl	120	201807
AA	American Airlines	DFW	Dallas Dallas/Fort Worth Intl Apt	SLC	Salt Lake City	209	201807
AA	American Airlines	DFW	Dallas Dallas/Fort Worth Intl Apt	SMF	Sacramento International Apt	146	201807
AA	American Airlines	DFW	Dallas Dallas/Fort Worth Intl Apt	STL	St Louis Lambert Intl Apt	204	201807
AA	American Airlines	DFW	Dallas Dallas/Fort Worth Intl Apt	TUL	Tulsa International Apt	262	201807
AA	American Airlines	DFW	Dallas Dallas/Fort Worth Intl Apt	TUS	Tucson International Apt	178	201807
AA	American Airlines	DTW	Detroit Metropolitan Wayne County	CLT	Charlotte	209	201807
AA	American Airlines	DTW	Detroit Metropolitan Wayne County	DFW	Dallas Dallas/Fort Worth Intl Apt	144	201807
AA	American Airlines	DTW	Detroit Metropolitan Wayne County	MIA	Miami International Apt	88	201807
AA	American Airlines	DTW	Detroit Metropolitan Wayne County	ORD	Chicago O'Hare International Apt	198	201807
AA	American Airlines	DTW	Detroit Metropolitan Wayne County	PHL	Philadelphia International Apt	170	201807
AA	American Airlines	DTW	Detroit Metropolitan Wayne County	PHX	Phoenix Sky Harbor Intl Apt	61	201807
AA	American Airlines	ELP	El Paso International Apt	DFW	Dallas Dallas/Fort Worth Intl Apt	262	201807
AA	American Airlines	ELP	El Paso International Apt	LAX	Los Angeles International Apt	62	201807
AA	American Airlines	ELP	El Paso International Apt	ORD	Chicago O'Hare International Apt	62	201807
AA	American Airlines	ELP	El Paso International Apt	PHX	Phoenix Sky Harbor Intl Apt	151	201807
AA	American Airlines	EUG	Eugene	LAX	Los Angeles International Apt	62	201807
AA	American Airlines	EUG	Eugene	PHX	Phoenix Sky Harbor Intl Apt	31	201807
AA	American Airlines	EWR	Newark Liberty International Apt	CLT	Charlotte	199	201807
AA	American Airlines	EWR	Newark Liberty International Apt	DFW	Dallas Dallas/Fort Worth Intl Apt	148	201807
AA	American Airlines	EWR	Newark Liberty International Apt	MIA	Miami International Apt	89	201807
AA	American Airlines	EWR	Newark Liberty International Apt	ORD	Chicago O'Hare International Apt	172	201807
AA	American Airlines	EWR	Newark Liberty International Apt	PHX	Phoenix Sky Harbor Intl Apt	118	201807
AA	American Airlines	FLL	Fort Lauderdale/Hollywood Intl Apt	CLT	Charlotte	187	201807
AA	American Airlines	FLL	Fort Lauderdale/Hollywood Intl Apt	DFW	Dallas Dallas/Fort Worth Intl Apt	181	201807
AA	American Airlines	FLL	Fort Lauderdale/Hollywood Intl Apt	ORD	Chicago O'Hare International Apt	60	201807
AA	American Airlines	FLL	Fort Lauderdale/Hollywood Intl Apt	PHL	Philadelphia International Apt	118	201807
AA	American Airlines	HNL	Honolulu	DFW	Dallas Dallas/Fort Worth Intl Apt	62	201807
AA	American Airlines	HNL	Honolulu	LAX	Los Angeles International Apt	155	201807
AA	American Airlines	HNL	Honolulu	PHX	Phoenix Sky Harbor Intl Apt	62	201807
AA	American Airlines	HOU	Houston William P. Hobby Apt	DFW	Dallas Dallas/Fort Worth Intl Apt	208	201807
AA	American Airlines	IAD	Washington Dulles International Apt	CLT	Charlotte	244	201807
AA	American Airlines	IAD	Washington Dulles International Apt	DFW	Dallas Dallas/Fort Worth Intl Apt	136	201807
AA	American Airlines	IAD	Washington Dulles International Apt	LAX	Los Angeles International Apt	61	201807
AA	American Airlines	IAD	Washington Dulles International Apt	MIA	Miami International Apt	61	201807
AA	American Airlines	IAH	Houston George Bush Intercont.	CLT	Charlotte	175	201807
AA	American Airlines	IAH	Houston George Bush Intercont.	DFW	Dallas Dallas/Fort Worth Intl Apt	301	201807
AA	American Airlines	IAH	Houston George Bush Intercont.	LAX	Los Angeles International Apt	93	201807
AA	American Airlines	IAH	Houston George Bush Intercont.	MIA	Miami International Apt	147	201807
AA	American Airlines	IAH	Houston George Bush Intercont.	ORD	Chicago O'Hare International Apt	110	201807
AA	American Airlines	IAH	Houston George Bush Intercont.	PHL	Philadelphia International Apt	104	201807
AA	American Airlines	IAH	Houston George Bush Intercont.	PHX	Phoenix Sky Harbor Intl Apt	122	201807
AA	American Airlines	IND	Indianapolis	CLT	Charlotte	240	201807
AA	American Airlines	IND	Indianapolis	DFW	Dallas Dallas/Fort Worth Intl Apt	146	201807
AA	American Airlines	IND	Indianapolis	JFK	New York J F Kennedy International Apt	31	201807
AA	American Airlines	IND	Indianapolis	LAX	Los Angeles International Apt	57	201807
AA	American Airlines	IND	Indianapolis	MIA	Miami International Apt	92	201807
AA	American Airlines	IND	Indianapolis	ORD	Chicago O'Hare International Apt	229	201807
AA	American Airlines	IND	Indianapolis	PHL	Philadelphia International Apt	172	201807
AA	American Airlines	IND	Indianapolis	PHX	Phoenix Sky Harbor Intl Apt	61	201807
AA	American Airlines	JFK	New York J F Kennedy International Apt	AUS	Austin-Bergstrom International Apt	31	201807
AA	American Airlines	JFK	New York J F Kennedy International Apt	BNA	Nashville	62	201807
AA	American Airlines	JFK	New York J F Kennedy International Apt	BOS	Boston Edward L Logan Intl Apt	153	201807
AA	American Airlines	JFK	New York J F Kennedy International Apt	BWI	Baltimore Washington International Apt	62	201807
AA	American Airlines	JFK	New York J F Kennedy International Apt	CLE	Cleveland Hopkins International Apt	93	201807
AA	American Airlines	JFK	New York J F Kennedy International Apt	CLT	Charlotte	181	201807
AA	American Airlines	JFK	New York J F Kennedy International Apt	CMH	Columbus John Glenn Intl Apt	31	201807
AA	American Airlines	JFK	New York J F Kennedy International Apt	DEN	Denver Intl Apt	31	201807
AA	American Airlines	JFK	New York J F Kennedy International Apt	DFW	Dallas Dallas/Fort Worth Intl Apt	88	201807
AA	American Airlines	JFK	New York J F Kennedy International Apt	IND	Indianapolis	31	201807
AA	American Airlines	JFK	New York J F Kennedy International Apt	LAS	Las Vegas McCarran International Apt	93	201807
AA	American Airlines	JFK	New York J F Kennedy International Apt	LAX	Los Angeles International Apt	348	201807
AA	American Airlines	JFK	New York J F Kennedy International Apt	MCO	Orlando International Apt	62	201807
AA	American Airlines	JFK	New York J F Kennedy International Apt	MIA	Miami International Apt	186	201807
AA	American Airlines	JFK	New York J F Kennedy International Apt	ORD	Chicago O'Hare International Apt	31	201807
AA	American Airlines	JFK	New York J F Kennedy International Apt	PHL	Philadelphia International Apt	31	201807
AA	American Airlines	JFK	New York J F Kennedy International Apt	PHX	Phoenix Sky Harbor Intl Apt	137	201807
AA	American Airlines	JFK	New York J F Kennedy International Apt	SAN	San Diego International	89	201807
AA	American Airlines	JFK	New York J F Kennedy International Apt	SEA	Seattle-Tacoma International Apt	89	201807
AA	American Airlines	JFK	New York J F Kennedy International Apt	SFO	San Francisco	140	201807
AA	American Airlines	KOA	Kona	DFW	Dallas Dallas/Fort Worth Intl Apt	31	201807
AA	American Airlines	KOA	Kona	LAX	Los Angeles International Apt	62	201807
AA	American Airlines	KOA	Kona	PHX	Phoenix Sky Harbor Intl Apt	31	201807
AA	American Airlines	LAS	Las Vegas McCarran International Apt	CLT	Charlotte	150	201807
AA	American Airlines	LAS	Las Vegas McCarran International Apt	DFW	Dallas Dallas/Fort Worth Intl Apt	325	201807
AA	American Airlines	LAS	Las Vegas McCarran International Apt	JFK	New York J F Kennedy International Apt	93	201807
AA	American Airlines	LAS	Las Vegas McCarran International Apt	LAX	Los Angeles International Apt	217	201807
AA	American Airlines	LAS	Las Vegas McCarran International Apt	MIA	Miami International Apt	92	201807
AA	American Airlines	LAS	Las Vegas McCarran International Apt	ORD	Chicago O'Hare International Apt	117	201807
AA	American Airlines	LAS	Las Vegas McCarran International Apt	PHL	Philadelphia International Apt	118	201807
AA	American Airlines	LAS	Las Vegas McCarran International Apt	PHX	Phoenix Sky Harbor Intl Apt	155	201807
AA	American Airlines	LAX	Los Angeles International Apt	ABQ	Albuquerque	93	201807
AA	American Airlines	LAX	Los Angeles International Apt	ATL	Atlanta Hartsfield-jackson Intl Apt	89	201807
AA	American Airlines	LAX	Los Angeles International Apt	AUS	Austin-Bergstrom International Apt	124	201807
AA	American Airlines	LAX	Los Angeles International Apt	BNA	Nashville	62	201807
AA	American Airlines	LAX	Los Angeles International Apt	BOS	Boston Edward L Logan Intl Apt	182	201807
AA	American Airlines	LAX	Los Angeles International Apt	CLT	Charlotte	186	201807
AA	American Airlines	LAX	Los Angeles International Apt	CMH	Columbus John Glenn Intl Apt	31	201807
AA	American Airlines	LAX	Los Angeles International Apt	DEN	Denver Intl Apt	91	201807
AA	American Airlines	LAX	Los Angeles International Apt	DFW	Dallas Dallas/Fort Worth Intl Apt	403	201807
AA	American Airlines	LAX	Los Angeles International Apt	ELP	El Paso International Apt	62	201807
AA	American Airlines	LAX	Los Angeles International Apt	EUG	Eugene	62	201807
AA	American Airlines	LAX	Los Angeles International Apt	HNL	Honolulu	155	201807
AA	American Airlines	LAX	Los Angeles International Apt	IAD	Washington Dulles International Apt	61	201807
AA	American Airlines	LAX	Los Angeles International Apt	IAH	Houston George Bush Intercont.	93	201807
AA	American Airlines	LAX	Los Angeles International Apt	IND	Indianapolis	58	201807
AA	American Airlines	LAX	Los Angeles International Apt	JFK	New York J F Kennedy International Apt	348	201807
AA	American Airlines	LAX	Los Angeles International Apt	KOA	Kona	62	201807
AA	American Airlines	LAX	Los Angeles International Apt	LAS	Las Vegas McCarran International Apt	217	201807
AA	American Airlines	LAX	Los Angeles International Apt	MCO	Orlando International Apt	124	201807
AA	American Airlines	LAX	Los Angeles International Apt	MIA	Miami International Apt	248	201807
AA	American Airlines	LAX	Los Angeles International Apt	MSY	New Orleans Louis Armstrong Intl Apt	31	201807
AA	American Airlines	LAX	Los Angeles International Apt	OGG	Kahului	124	201807
AA	American Airlines	LAX	Los Angeles International Apt	ORD	Chicago O'Hare International Apt	310	201807
AA	American Airlines	LAX	Los Angeles International Apt	PDX	Portland International	85	201807
AA	American Airlines	LAX	Los Angeles International Apt	PHL	Philadelphia International Apt	180	201807
AA	American Airlines	LAX	Los Angeles International Apt	PHX	Phoenix Sky Harbor Intl Apt	208	201807
AA	American Airlines	LAX	Los Angeles International Apt	RNO	Reno	124	201807
AA	American Airlines	LAX	Los Angeles International Apt	SAN	San Diego International	185	201807
AA	American Airlines	LAX	Los Angeles International Apt	SAT	San Antonio International Apt	62	201807
AA	American Airlines	LAX	Los Angeles International Apt	SEA	Seattle-Tacoma International Apt	147	201807
AA	American Airlines	LAX	Los Angeles International Apt	SFO	San Francisco	294	201807
AA	American Airlines	LAX	Los Angeles International Apt	SJC	San Jose Norman Y. Mineta Intl	148	201807
AA	American Airlines	LAX	Los Angeles International Apt	SLC	Salt Lake City	93	201807
AA	American Airlines	LAX	Los Angeles International Apt	SMF	Sacramento International Apt	124	201807
AA	American Airlines	LAX	Los Angeles International Apt	STL	St Louis Lambert Intl Apt	62	201807
AA	American Airlines	LAX	Los Angeles International Apt	TUS	Tucson International Apt	93	201807
AA	American Airlines	MCI	Kansas City International Apt	CLT	Charlotte	122	201807
AA	American Airlines	MCI	Kansas City International Apt	DFW	Dallas Dallas/Fort Worth Intl Apt	206	201807
AA	American Airlines	MCI	Kansas City International Apt	MIA	Miami International Apt	31	201807
AA	American Airlines	MCI	Kansas City International Apt	ORD	Chicago O'Hare International Apt	179	201807
AA	American Airlines	MCI	Kansas City International Apt	PHL	Philadelphia International Apt	86	201807
AA	American Airlines	MCI	Kansas City International Apt	PHX	Phoenix Sky Harbor Intl Apt	60	201807
AA	American Airlines	MCO	Orlando International Apt	CLT	Charlotte	275	201807
AA	American Airlines	MCO	Orlando International Apt	DFW	Dallas Dallas/Fort Worth Intl Apt	271	201807
AA	American Airlines	MCO	Orlando International Apt	JFK	New York J F Kennedy International Apt	62	201807
AA	American Airlines	MCO	Orlando International Apt	LAX	Los Angeles International Apt	124	201807
AA	American Airlines	MCO	Orlando International Apt	MIA	Miami International Apt	217	201807
AA	American Airlines	MCO	Orlando International Apt	ORD	Chicago O'Hare International Apt	146	201807
AA	American Airlines	MCO	Orlando International Apt	PHL	Philadelphia International Apt	207	201807
AA	American Airlines	MCO	Orlando International Apt	PHX	Phoenix Sky Harbor Intl Apt	91	201807
AA	American Airlines	MIA	Miami International Apt	ATL	Atlanta Hartsfield-jackson Intl Apt	215	201807
AA	American Airlines	MIA	Miami International Apt	AUS	Austin-Bergstrom International Apt	93	201807
AA	American Airlines	MIA	Miami International Apt	BNA	Nashville	93	201807
AA	American Airlines	MIA	Miami International Apt	BOS	Boston Edward L Logan Intl Apt	215	201807
AA	American Airlines	MIA	Miami International Apt	BWI	Baltimore Washington International Apt	93	201807
AA	American Airlines	MIA	Miami International Apt	CLE	Cleveland Hopkins International Apt	93	201807
AA	American Airlines	MIA	Miami International Apt	CLT	Charlotte	213	201807
AA	American Airlines	MIA	Miami International Apt	CMH	Columbus John Glenn Intl Apt	92	201807
AA	American Airlines	MIA	Miami International Apt	DEN	Denver Intl Apt	93	201807
AA	American Airlines	MIA	Miami International Apt	DFW	Dallas Dallas/Fort Worth Intl Apt	313	201807
AA	American Airlines	MIA	Miami International Apt	DTW	Detroit Metropolitan Wayne County	88	201807
AA	American Airlines	MIA	Miami International Apt	EWR	Newark Liberty International Apt	89	201807
AA	American Airlines	MIA	Miami International Apt	IAD	Washington Dulles International Apt	62	201807
AA	American Airlines	MIA	Miami International Apt	IAH	Houston George Bush Intercont.	147	201807
AA	American Airlines	MIA	Miami International Apt	IND	Indianapolis	92	201807
AA	American Airlines	MIA	Miami International Apt	JFK	New York J F Kennedy International Apt	187	201807
AA	American Airlines	MIA	Miami International Apt	LAS	Las Vegas McCarran International Apt	93	201807
AA	American Airlines	MIA	Miami International Apt	LAX	Los Angeles International Apt	248	201807
AA	American Airlines	MIA	Miami International Apt	MCI	Kansas City International Apt	31	201807
AA	American Airlines	MIA	Miami International Apt	MCO	Orlando International Apt	217	201807
AA	American Airlines	MIA	Miami International Apt	MSP	Minneapolis/St Paul International Apt	62	201807
AA	American Airlines	MIA	Miami International Apt	MSY	New Orleans Louis Armstrong Intl Apt	124	201807
AA	American Airlines	MIA	Miami International Apt	ORD	Chicago O'Hare International Apt	279	201807
AA	American Airlines	MIA	Miami International Apt	PHL	Philadelphia International Apt	186	201807
AA	American Airlines	MIA	Miami International Apt	PHX	Phoenix Sky Harbor Intl Apt	93	201807
AA	American Airlines	MIA	Miami International Apt	SAN	San Diego International	31	201807
AA	American Airlines	MIA	Miami International Apt	SAT	San Antonio International Apt	31	201807
AA	American Airlines	MIA	Miami International Apt	SEA	Seattle-Tacoma International Apt	62	201807
AA	American Airlines	MIA	Miami International Apt	SFO	San Francisco	124	201807
AA	American Airlines	MIA	Miami International Apt	STL	St Louis Lambert Intl Apt	84	201807
AA	American Airlines	MIA	Miami International Apt	TUL	Tulsa International Apt	4	201807
AA	American Airlines	MKE	Milwaukee General Mitchell Intl Apt	CLT	Charlotte	149	201807
AA	American Airlines	MKE	Milwaukee General Mitchell Intl Apt	DFW	Dallas Dallas/Fort Worth Intl Apt	116	201807
AA	American Airlines	MKE	Milwaukee General Mitchell Intl Apt	ORD	Chicago O'Hare International Apt	122	201807
AA	American Airlines	MKE	Milwaukee General Mitchell Intl Apt	PHL	Philadelphia International Apt	140	201807
AA	American Airlines	MKE	Milwaukee General Mitchell Intl Apt	PHX	Phoenix Sky Harbor Intl Apt	57	201807
AA	American Airlines	MSP	Minneapolis/St Paul International Apt	CLT	Charlotte	112	201807
AA	American Airlines	MSP	Minneapolis/St Paul International Apt	DFW	Dallas Dallas/Fort Worth Intl Apt	181	201807
AA	American Airlines	MSP	Minneapolis/St Paul International Apt	MIA	Miami International Apt	62	201807
AA	American Airlines	MSP	Minneapolis/St Paul International Apt	ORD	Chicago O'Hare International Apt	201	201807
AA	American Airlines	MSP	Minneapolis/St Paul International Apt	PHL	Philadelphia International Apt	107	201807
AA	American Airlines	MSP	Minneapolis/St Paul International Apt	PHX	Phoenix Sky Harbor Intl Apt	123	201807
AA	American Airlines	MSY	New Orleans Louis Armstrong Intl Apt	CLT	Charlotte	213	201807
AA	American Airlines	MSY	New Orleans Louis Armstrong Intl Apt	DFW	Dallas Dallas/Fort Worth Intl Apt	241	201807
AA	American Airlines	MSY	New Orleans Louis Armstrong Intl Apt	LAX	Los Angeles International Apt	31	201807
AA	American Airlines	MSY	New Orleans Louis Armstrong Intl Apt	MIA	Miami International Apt	124	201807
AA	American Airlines	MSY	New Orleans Louis Armstrong Intl Apt	ORD	Chicago O'Hare International Apt	57	201807
AA	American Airlines	MSY	New Orleans Louis Armstrong Intl Apt	PHL	Philadelphia International Apt	60	201807
AA	American Airlines	OAK	Oakland International Apt	DFW	Dallas Dallas/Fort Worth Intl Apt	60	201807
AA	American Airlines	OAK	Oakland International Apt	PHX	Phoenix Sky Harbor Intl Apt	119	201807
AA	American Airlines	OGG	Kahului	DFW	Dallas Dallas/Fort Worth Intl Apt	62	201807
AA	American Airlines	OGG	Kahului	LAX	Los Angeles International Apt	124	201807
AA	American Airlines	OGG	Kahului	PHX	Phoenix Sky Harbor Intl Apt	62	201807
AA	American Airlines	ORD	Chicago O'Hare International Apt	ABQ	Albuquerque	60	201807
AA	American Airlines	ORD	Chicago O'Hare International Apt	ATL	Atlanta Hartsfield-jackson Intl Apt	169	201807
AA	American Airlines	ORD	Chicago O'Hare International Apt	AUS	Austin-Bergstrom International Apt	118	201807
AA	American Airlines	ORD	Chicago O'Hare International Apt	BNA	Nashville	285	201807
AA	American Airlines	ORD	Chicago O'Hare International Apt	BOI	Boise	31	201807
AA	American Airlines	ORD	Chicago O'Hare International Apt	BOS	Boston Edward L Logan Intl Apt	303	201807
AA	American Airlines	ORD	Chicago O'Hare International Apt	BWI	Baltimore Washington International Apt	117	201807
AA	American Airlines	ORD	Chicago O'Hare International Apt	CLE	Cleveland Hopkins International Apt	196	201807
AA	American Airlines	ORD	Chicago O'Hare International Apt	CLT	Charlotte	277	201807
AA	American Airlines	ORD	Chicago O'Hare International Apt	CMH	Columbus John Glenn Intl Apt	226	201807
AA	American Airlines	ORD	Chicago O'Hare International Apt	COS	Colorado Springs Municipal	62	201807
AA	American Airlines	ORD	Chicago O'Hare International Apt	DEN	Denver Intl Apt	142	201807
AA	American Airlines	ORD	Chicago O'Hare International Apt	DFW	Dallas Dallas/Fort Worth Intl Apt	399	201807
AA	American Airlines	ORD	Chicago O'Hare International Apt	DTW	Detroit Metropolitan Wayne County	198	201807
AA	American Airlines	ORD	Chicago O'Hare International Apt	ELP	El Paso International Apt	62	201807
AA	American Airlines	ORD	Chicago O'Hare International Apt	EWR	Newark Liberty International Apt	172	201807
AA	American Airlines	ORD	Chicago O'Hare International Apt	FLL	Fort Lauderdale/Hollywood Intl Apt	60	201807
AA	American Airlines	ORD	Chicago O'Hare International Apt	IAH	Houston George Bush Intercont.	110	201807
AA	American Airlines	ORD	Chicago O'Hare International Apt	IND	Indianapolis	229	201807
AA	American Airlines	ORD	Chicago O'Hare International Apt	JFK	New York J F Kennedy International Apt	31	201807
AA	American Airlines	ORD	Chicago O'Hare International Apt	LAS	Las Vegas McCarran International Apt	116	201807
AA	American Airlines	ORD	Chicago O'Hare International Apt	LAX	Los Angeles International Apt	310	201807
AA	American Airlines	ORD	Chicago O'Hare International Apt	MCI	Kansas City International Apt	179	201807
AA	American Airlines	ORD	Chicago O'Hare International Apt	MCO	Orlando International Apt	146	201807
AA	American Airlines	ORD	Chicago O'Hare International Apt	MIA	Miami International Apt	279	201807
AA	American Airlines	ORD	Chicago O'Hare International Apt	MKE	Milwaukee General Mitchell Intl Apt	122	201807
AA	American Airlines	ORD	Chicago O'Hare International Apt	MSP	Minneapolis/St Paul International Apt	201	201807
AA	American Airlines	ORD	Chicago O'Hare International Apt	MSY	New Orleans Louis Armstrong Intl Apt	57	201807
AA	American Airlines	ORD	Chicago O'Hare International Apt	PDX	Portland International	89	201807
AA	American Airlines	ORD	Chicago O'Hare International Apt	PHL	Philadelphia International Apt	279	201807
AA	American Airlines	ORD	Chicago O'Hare International Apt	PHX	Phoenix Sky Harbor Intl Apt	279	201807
AA	American Airlines	ORD	Chicago O'Hare International Apt	RNO	Reno	31	201807
AA	American Airlines	ORD	Chicago O'Hare International Apt	SAN	San Diego International	118	201807
AA	American Airlines	ORD	Chicago O'Hare International Apt	SAT	San Antonio International Apt	88	201807
AA	American Airlines	ORD	Chicago O'Hare International Apt	SEA	Seattle-Tacoma International Apt	168	201807
AA	American Airlines	ORD	Chicago O'Hare International Apt	SFO	San Francisco	178	201807
AA	American Airlines	ORD	Chicago O'Hare International Apt	SJC	San Jose Norman Y. Mineta Intl	83	201807
AA	American Airlines	ORD	Chicago O'Hare International Apt	SLC	Salt Lake City	115	201807
AA	American Airlines	ORD	Chicago O'Hare International Apt	SMF	Sacramento International Apt	31	201807
AA	American Airlines	ORD	Chicago O'Hare International Apt	STL	St Louis Lambert Intl Apt	172	201807
AA	American Airlines	ORD	Chicago O'Hare International Apt	TUL	Tulsa International Apt	57	201807
AA	American Airlines	ORD	Chicago O'Hare International Apt	TUS	Tucson International Apt	61	201807
AA	American Airlines	PDX	Portland International	CLT	Charlotte	58	201807
AA	American Airlines	PDX	Portland International	DFW	Dallas Dallas/Fort Worth Intl Apt	150	201807
AA	American Airlines	PDX	Portland International	LAX	Los Angeles International Apt	84	201807
AA	American Airlines	PDX	Portland International	ORD	Chicago O'Hare International Apt	90	201807
AA	American Airlines	PDX	Portland International	PHL	Philadelphia International Apt	31	201807
AA	American Airlines	PDX	Portland International	PHX	Phoenix Sky Harbor Intl Apt	122	201807
AA	American Airlines	PHL	Philadelphia International Apt	ATL	Atlanta Hartsfield-jackson Intl Apt	171	201807
AA	American Airlines	PHL	Philadelphia International Apt	AUS	Austin-Bergstrom International Apt	58	201807
AA	American Airlines	PHL	Philadelphia International Apt	BNA	Nashville	159	201807
AA	American Airlines	PHL	Philadelphia International Apt	BOS	Boston Edward L Logan Intl Apt	330	201807
AA	American Airlines	PHL	Philadelphia International Apt	BWI	Baltimore Washington International Apt	84	201807
AA	American Airlines	PHL	Philadelphia International Apt	CLE	Cleveland Hopkins International Apt	167	201807
AA	American Airlines	PHL	Philadelphia International Apt	CLT	Charlotte	265	201807
AA	American Airlines	PHL	Philadelphia International Apt	CMH	Columbus John Glenn Intl Apt	199	201807
AA	American Airlines	PHL	Philadelphia International Apt	DEN	Denver Intl Apt	84	201807
AA	American Airlines	PHL	Philadelphia International Apt	DFW	Dallas Dallas/Fort Worth Intl Apt	279	201807
AA	American Airlines	PHL	Philadelphia International Apt	DTW	Detroit Metropolitan Wayne County	170	201807
AA	American Airlines	PHL	Philadelphia International Apt	FLL	Fort Lauderdale/Hollywood Intl Apt	118	201807
AA	American Airlines	PHL	Philadelphia International Apt	IAH	Houston George Bush Intercont.	104	201807
AA	American Airlines	PHL	Philadelphia International Apt	IND	Indianapolis	172	201807
AA	American Airlines	PHL	Philadelphia International Apt	JFK	New York J F Kennedy International Apt	31	201807
AA	American Airlines	PHL	Philadelphia International Apt	LAS	Las Vegas McCarran International Apt	118	201807
AA	American Airlines	PHL	Philadelphia International Apt	LAX	Los Angeles International Apt	180	201807
AA	American Airlines	PHL	Philadelphia International Apt	MCI	Kansas City International Apt	87	201807
AA	American Airlines	PHL	Philadelphia International Apt	MCO	Orlando International Apt	207	201807
AA	American Airlines	PHL	Philadelphia International Apt	MIA	Miami International Apt	186	201807
AA	American Airlines	PHL	Philadelphia International Apt	MKE	Milwaukee General Mitchell Intl Apt	140	201807
AA	American Airlines	PHL	Philadelphia International Apt	MSP	Minneapolis/St Paul International Apt	108	201807
AA	American Airlines	PHL	Philadelphia International Apt	MSY	New Orleans Louis Armstrong Intl Apt	60	201807
AA	American Airlines	PHL	Philadelphia International Apt	ORD	Chicago O'Hare International Apt	279	201807
AA	American Airlines	PHL	Philadelphia International Apt	PDX	Portland International	31	201807
AA	American Airlines	PHL	Philadelphia International Apt	PHX	Phoenix Sky Harbor Intl Apt	208	201807
AA	American Airlines	PHL	Philadelphia International Apt	SAN	San Diego International	87	201807
AA	American Airlines	PHL	Philadelphia International Apt	SAT	San Antonio International Apt	31	201807
AA	American Airlines	PHL	Philadelphia International Apt	SEA	Seattle-Tacoma International Apt	84	201807
AA	American Airlines	PHL	Philadelphia International Apt	SFO	San Francisco	141	201807
AA	American Airlines	PHL	Philadelphia International Apt	SLC	Salt Lake City	31	201807
AA	American Airlines	PHL	Philadelphia International Apt	STL	St Louis Lambert Intl Apt	149	201807
AA	American Airlines	PHX	Phoenix Sky Harbor Intl Apt	ABQ	Albuquerque	151	201807
AA	American Airlines	PHX	Phoenix Sky Harbor Intl Apt	ATL	Atlanta Hartsfield-jackson Intl Apt	62	201807
AA	American Airlines	PHX	Phoenix Sky Harbor Intl Apt	AUS	Austin-Bergstrom International Apt	116	201807
AA	American Airlines	PHX	Phoenix Sky Harbor Intl Apt	BOI	Boise	122	201807
AA	American Airlines	PHX	Phoenix Sky Harbor Intl Apt	BOS	Boston Edward L Logan Intl Apt	124	201807
AA	American Airlines	PHX	Phoenix Sky Harbor Intl Apt	BWI	Baltimore Washington International Apt	62	201807
AA	American Airlines	PHX	Phoenix Sky Harbor Intl Apt	CLT	Charlotte	248	201807
AA	American Airlines	PHX	Phoenix Sky Harbor Intl Apt	CMH	Columbus John Glenn Intl Apt	60	201807
AA	American Airlines	PHX	Phoenix Sky Harbor Intl Apt	DEN	Denver Intl Apt	119	201807
AA	American Airlines	PHX	Phoenix Sky Harbor Intl Apt	DFW	Dallas Dallas/Fort Worth Intl Apt	367	201807
AA	American Airlines	PHX	Phoenix Sky Harbor Intl Apt	DTW	Detroit Metropolitan Wayne County	61	201807
AA	American Airlines	PHX	Phoenix Sky Harbor Intl Apt	ELP	El Paso International Apt	151	201807
AA	American Airlines	PHX	Phoenix Sky Harbor Intl Apt	EUG	Eugene	31	201807
AA	American Airlines	PHX	Phoenix Sky Harbor Intl Apt	EWR	Newark Liberty International Apt	118	201807
AA	American Airlines	PHX	Phoenix Sky Harbor Intl Apt	HNL	Honolulu	62	201807
AA	American Airlines	PHX	Phoenix Sky Harbor Intl Apt	IAH	Houston George Bush Intercont.	122	201807
AA	American Airlines	PHX	Phoenix Sky Harbor Intl Apt	IND	Indianapolis	61	201807
AA	American Airlines	PHX	Phoenix Sky Harbor Intl Apt	JFK	New York J F Kennedy International Apt	137	201807
AA	American Airlines	PHX	Phoenix Sky Harbor Intl Apt	KOA	Kona	31	201807
AA	American Airlines	PHX	Phoenix Sky Harbor Intl Apt	LAS	Las Vegas McCarran International Apt	155	201807
AA	American Airlines	PHX	Phoenix Sky Harbor Intl Apt	LAX	Los Angeles International Apt	208	201807
AA	American Airlines	PHX	Phoenix Sky Harbor Intl Apt	MCI	Kansas City International Apt	60	201807
AA	American Airlines	PHX	Phoenix Sky Harbor Intl Apt	MCO	Orlando International Apt	91	201807
AA	American Airlines	PHX	Phoenix Sky Harbor Intl Apt	MIA	Miami International Apt	93	201807
AA	American Airlines	PHX	Phoenix Sky Harbor Intl Apt	MKE	Milwaukee General Mitchell Intl Apt	57	201807
AA	American Airlines	PHX	Phoenix Sky Harbor Intl Apt	MSP	Minneapolis/St Paul International Apt	123	201807
AA	American Airlines	PHX	Phoenix Sky Harbor Intl Apt	OAK	Oakland International Apt	119	201807
AA	American Airlines	PHX	Phoenix Sky Harbor Intl Apt	OGG	Kahului	62	201807
AA	American Airlines	PHX	Phoenix Sky Harbor Intl Apt	ORD	Chicago O'Hare International Apt	279	201807
AA	American Airlines	PHX	Phoenix Sky Harbor Intl Apt	PDX	Portland International	122	201807
AA	American Airlines	PHX	Phoenix Sky Harbor Intl Apt	PHL	Philadelphia International Apt	208	201807
AA	American Airlines	PHX	Phoenix Sky Harbor Intl Apt	RNO	Reno	119	201807
AA	American Airlines	PHX	Phoenix Sky Harbor Intl Apt	SAN	San Diego International	155	201807
AA	American Airlines	PHX	Phoenix Sky Harbor Intl Apt	SAT	San Antonio International Apt	116	201807
AA	American Airlines	PHX	Phoenix Sky Harbor Intl Apt	SBA	Santa Barbara	153	201807
AA	American Airlines	PHX	Phoenix Sky Harbor Intl Apt	SBP	San Luis Obispo	122	201807
AA	American Airlines	PHX	Phoenix Sky Harbor Intl Apt	SEA	Seattle-Tacoma International Apt	120	201807
AA	American Airlines	PHX	Phoenix Sky Harbor Intl Apt	SFO	San Francisco	150	201807
AA	American Airlines	PHX	Phoenix Sky Harbor Intl Apt	SJC	San Jose Norman Y. Mineta Intl	155	201807
AA	American Airlines	PHX	Phoenix Sky Harbor Intl Apt	SLC	Salt Lake City	114	201807
AA	American Airlines	PHX	Phoenix Sky Harbor Intl Apt	SMF	Sacramento International Apt	150	201807
AA	American Airlines	PHX	Phoenix Sky Harbor Intl Apt	STL	St Louis Lambert Intl Apt	60	201807
AA	American Airlines	PHX	Phoenix Sky Harbor Intl Apt	TUS	Tucson International Apt	182	201807
AA	American Airlines	RNO	Reno	DFW	Dallas Dallas/Fort Worth Intl Apt	82	201807
AA	American Airlines	RNO	Reno	LAX	Los Angeles International Apt	124	201807
AA	American Airlines	RNO	Reno	ORD	Chicago O'Hare International Apt	31	201807
AA	American Airlines	RNO	Reno	PHX	Phoenix Sky Harbor Intl Apt	119	201807
AA	American Airlines	SAN	San Diego International	CLT	Charlotte	92	201807
AA	American Airlines	SAN	San Diego International	DFW	Dallas Dallas/Fort Worth Intl Apt	271	201807
AA	American Airlines	SAN	San Diego International	JFK	New York J F Kennedy International Apt	89	201807
AA	American Airlines	SAN	San Diego International	LAX	Los Angeles International Apt	185	201807
AA	American Airlines	SAN	San Diego International	MIA	Miami International Apt	31	201807
AA	American Airlines	SAN	San Diego International	ORD	Chicago O'Hare International Apt	118	201807
AA	American Airlines	SAN	San Diego International	PHL	Philadelphia International Apt	86	201807
AA	American Airlines	SAN	San Diego International	PHX	Phoenix Sky Harbor Intl Apt	155	201807
AA	American Airlines	SAT	San Antonio International Apt	CLT	Charlotte	109	201807
AA	American Airlines	SAT	San Antonio International Apt	DFW	Dallas Dallas/Fort Worth Intl Apt	327	201807
AA	American Airlines	SAT	San Antonio International Apt	LAX	Los Angeles International Apt	62	201807
AA	American Airlines	SAT	San Antonio International Apt	MIA	Miami International Apt	31	201807
AA	American Airlines	SAT	San Antonio International Apt	ORD	Chicago O'Hare International Apt	88	201807
AA	American Airlines	SAT	San Antonio International Apt	PHL	Philadelphia International Apt	31	201807
AA	American Airlines	SAT	San Antonio International Apt	PHX	Phoenix Sky Harbor Intl Apt	116	201807
AA	American Airlines	SBA	Santa Barbara	DFW	Dallas Dallas/Fort Worth Intl Apt	31	201807
AA	American Airlines	SBA	Santa Barbara	PHX	Phoenix Sky Harbor Intl Apt	153	201807
AA	American Airlines	SBP	San Luis Obispo	PHX	Phoenix Sky Harbor Intl Apt	122	201807
AA	American Airlines	SEA	Seattle-Tacoma International Apt	CLT	Charlotte	121	201807
AA	American Airlines	SEA	Seattle-Tacoma International Apt	DFW	Dallas Dallas/Fort Worth Intl Apt	286	201807
AA	American Airlines	SEA	Seattle-Tacoma International Apt	JFK	New York J F Kennedy International Apt	89	201807
AA	American Airlines	SEA	Seattle-Tacoma International Apt	LAX	Los Angeles International Apt	147	201807
AA	American Airlines	SEA	Seattle-Tacoma International Apt	MIA	Miami International Apt	62	201807
AA	American Airlines	SEA	Seattle-Tacoma International Apt	ORD	Chicago O'Hare International Apt	168	201807
AA	American Airlines	SEA	Seattle-Tacoma International Apt	PHL	Philadelphia International Apt	84	201807
AA	American Airlines	SEA	Seattle-Tacoma International Apt	PHX	Phoenix Sky Harbor Intl Apt	120	201807
AA	American Airlines	SFO	San Francisco	CLT	Charlotte	182	201807
AA	American Airlines	SFO	San Francisco	DFW	Dallas Dallas/Fort Worth Intl Apt	271	201807
AA	American Airlines	SFO	San Francisco	JFK	New York J F Kennedy International Apt	140	201807
AA	American Airlines	SFO	San Francisco	LAX	Los Angeles International Apt	294	201807
AA	American Airlines	SFO	San Francisco	MIA	Miami International Apt	124	201807
AA	American Airlines	SFO	San Francisco	ORD	Chicago O'Hare International Apt	179	201807
AA	American Airlines	SFO	San Francisco	PHL	Philadelphia International Apt	141	201807
AA	American Airlines	SFO	San Francisco	PHX	Phoenix Sky Harbor Intl Apt	150	201807
AA	American Airlines	SJC	San Jose Norman Y. Mineta Intl	CLT	Charlotte	29	201807
AA	American Airlines	SJC	San Jose Norman Y. Mineta Intl	DFW	Dallas Dallas/Fort Worth Intl Apt	120	201807
AA	American Airlines	SJC	San Jose Norman Y. Mineta Intl	LAX	Los Angeles International Apt	148	201807
AA	American Airlines	SJC	San Jose Norman Y. Mineta Intl	ORD	Chicago O'Hare International Apt	83	201807
AA	American Airlines	SJC	San Jose Norman Y. Mineta Intl	PHX	Phoenix Sky Harbor Intl Apt	155	201807
AA	American Airlines	SLC	Salt Lake City	CLT	Charlotte	31	201807
AA	American Airlines	SLC	Salt Lake City	DFW	Dallas Dallas/Fort Worth Intl Apt	209	201807
AA	American Airlines	SLC	Salt Lake City	LAX	Los Angeles International Apt	93	201807
AA	American Airlines	SLC	Salt Lake City	ORD	Chicago O'Hare International Apt	115	201807
AA	American Airlines	SLC	Salt Lake City	PHL	Philadelphia International Apt	31	201807
AA	American Airlines	SLC	Salt Lake City	PHX	Phoenix Sky Harbor Intl Apt	114	201807
AA	American Airlines	SMF	Sacramento International Apt	CLT	Charlotte	31	201807
AA	American Airlines	SMF	Sacramento International Apt	DFW	Dallas Dallas/Fort Worth Intl Apt	146	201807
AA	American Airlines	SMF	Sacramento International Apt	LAX	Los Angeles International Apt	124	201807
AA	American Airlines	SMF	Sacramento International Apt	ORD	Chicago O'Hare International Apt	31	201807
AA	American Airlines	SMF	Sacramento International Apt	PHX	Phoenix Sky Harbor Intl Apt	150	201807
AA	American Airlines	STL	St Louis Lambert Intl Apt	CLT	Charlotte	169	201807
AA	American Airlines	STL	St Louis Lambert Intl Apt	DFW	Dallas Dallas/Fort Worth Intl Apt	204	201807
AA	American Airlines	STL	St Louis Lambert Intl Apt	LAX	Los Angeles International Apt	62	201807
AA	American Airlines	STL	St Louis Lambert Intl Apt	MIA	Miami International Apt	84	201807
AA	American Airlines	STL	St Louis Lambert Intl Apt	ORD	Chicago O'Hare International Apt	172	201807
AA	American Airlines	STL	St Louis Lambert Intl Apt	PHL	Philadelphia International Apt	149	201807
AA	American Airlines	STL	St Louis Lambert Intl Apt	PHX	Phoenix Sky Harbor Intl Apt	60	201807
AA	American Airlines	TUL	Tulsa International Apt	CLT	Charlotte	62	201807
AA	American Airlines	TUL	Tulsa International Apt	DFW	Dallas Dallas/Fort Worth Intl Apt	262	201807
AA	American Airlines	TUL	Tulsa International Apt	MIA	Miami International Apt	4	201807
AA	American Airlines	TUL	Tulsa International Apt	ORD	Chicago O'Hare International Apt	57	201807
AA	American Airlines	TUS	Tucson International Apt	CLT	Charlotte	29	201807
AA	American Airlines	TUS	Tucson International Apt	DFW	Dallas Dallas/Fort Worth Intl Apt	178	201807
AA	American Airlines	TUS	Tucson International Apt	LAX	Los Angeles International Apt	93	201807
AA	American Airlines	TUS	Tucson International Apt	ORD	Chicago O'Hare International Apt	61	201807
AA	American Airlines	TUS	Tucson International Apt	PHX	Phoenix Sky Harbor Intl Apt	182	201807
Data copyright 2019. OAG Aviation Worldwide Ltd. All right reserved.
USAGE: 526 RECORDS.

## Sheet: SWA-42airport
OAG ANALYSER
VERSION: 2.0.1. Data load date: 11 Aug 2019
SEARCH ATTRIBUTES/PARAMETERS:
Report Type: Schedules Power Table
Dimensions: [Carrier Code, Carrier Name, Dep Airport Code, Dep Airport Name, Arr Airport Code, Arr Airport Name]
Metrics: [Frequency]
Type of Operation: Published carrier, Operating Flights
Carrier: Included[IATA: WN]
Carrier Category: All
Include alliance affiliates: false
Origin: Airport(s) Included[ABQ,ATL,AUS,BNA,BOI,BOS,BWI,CLE,CLT,CMH,CUN,DEN,DTW,ELP,EWR,FLL,HOU,IAD,IND,LAS,LAX,MCI,MCO,MDW,MKE,MSP,MSY,OAK,PDX,PHL,PHX,RNO,SAN,SAT,SEA,SFO,SJC,SLC,SMF,STL,TUL,TUS]
Destination: Airport(s) Included[ABQ,ATL,AUS,BNA,BOI,BOS,BWI,CLE,CLT,CMH,CUN,DEN,DTW,ELP,EWR,FLL,HOU,IAD,IND,LAS,LAX,MCI,MCO,MDW,MKE,MSP,MSY,OAK,PDX,PHL,PHX,RNO,SAN,SAT,SEA,SFO,SJC,SLC,SMF,STL,TUL,TUS]
Direction: One way
Aggregate route: false
Flight Type: All
Service type: C,G,J,Q,S
Include Surface: false
Non-stop: true
Equipment Group: A,H,J,JN,JW,P,RJ,T,
Period: Month 01Jul2018 to 31Jul2018
TimeSeries: true
MONTHLY DATED AT 8 2019
REPORT DATED AT: Aug 12-2019. TIME: 09:04 (BST)
Carrier Code	Carrier Name	Dep Airport Code	Dep Airport Name	Arr Airport Code	Arr Airport Name	Frequency	Time series
WN	Southwest Airlines	ABQ	Albuquerque	AUS	Austin-Bergstrom International Apt	19	201807
WN	Southwest Airlines	ABQ	Albuquerque	BWI	Baltimore Washington International Apt	66	201807
WN	Southwest Airlines	ABQ	Albuquerque	DEN	Denver Intl Apt	85	201807
WN	Southwest Airlines	ABQ	Albuquerque	HOU	Houston William P. Hobby Apt	87	201807
WN	Southwest Airlines	ABQ	Albuquerque	LAS	Las Vegas McCarran International Apt	120	201807
WN	Southwest Airlines	ABQ	Albuquerque	LAX	Los Angeles International Apt	67	201807
WN	Southwest Airlines	ABQ	Albuquerque	MCI	Kansas City International Apt	31	201807
WN	Southwest Airlines	ABQ	Albuquerque	MCO	Orlando International Apt	9	201807
WN	Southwest Airlines	ABQ	Albuquerque	MDW	Chicago Midway Intl	71	201807
WN	Southwest Airlines	ABQ	Albuquerque	OAK	Oakland International Apt	82	201807
WN	Southwest Airlines	ABQ	Albuquerque	PDX	Portland International	27	201807
WN	Southwest Airlines	ABQ	Albuquerque	PHX	Phoenix Sky Harbor Intl Apt	176	201807
WN	Southwest Airlines	ABQ	Albuquerque	SAN	San Diego International	62	201807
WN	Southwest Airlines	ABQ	Albuquerque	SJC	San Jose Norman Y. Mineta Intl	5	201807
WN	Southwest Airlines	ATL	Atlanta Hartsfield-jackson Intl Apt	AUS	Austin-Bergstrom International Apt	84	201807
WN	Southwest Airlines	ATL	Atlanta Hartsfield-jackson Intl Apt	BOS	Boston Edward L Logan Intl Apt	82	201807
WN	Southwest Airlines	ATL	Atlanta Hartsfield-jackson Intl Apt	BWI	Baltimore Washington International Apt	176	201807
WN	Southwest Airlines	ATL	Atlanta Hartsfield-jackson Intl Apt	CLE	Cleveland Hopkins International Apt	56	201807
WN	Southwest Airlines	ATL	Atlanta Hartsfield-jackson Intl Apt	CMH	Columbus John Glenn Intl Apt	80	201807
WN	Southwest Airlines	ATL	Atlanta Hartsfield-jackson Intl Apt	CUN	Cancun	35	201807
WN	Southwest Airlines	ATL	Atlanta Hartsfield-jackson Intl Apt	DEN	Denver Intl Apt	148	201807
WN	Southwest Airlines	ATL	Atlanta Hartsfield-jackson Intl Apt	DTW	Detroit Metropolitan Wayne County	88	201807
WN	Southwest Airlines	ATL	Atlanta Hartsfield-jackson Intl Apt	FLL	Fort Lauderdale/Hollywood Intl Apt	155	201807
WN	Southwest Airlines	ATL	Atlanta Hartsfield-jackson Intl Apt	HOU	Houston William P. Hobby Apt	180	201807
WN	Southwest Airlines	ATL	Atlanta Hartsfield-jackson Intl Apt	IAD	Washington Dulles International Apt	58	201807
WN	Southwest Airlines	ATL	Atlanta Hartsfield-jackson Intl Apt	IND	Indianapolis	87	201807
WN	Southwest Airlines	ATL	Atlanta Hartsfield-jackson Intl Apt	LAS	Las Vegas McCarran International Apt	118	201807
WN	Southwest Airlines	ATL	Atlanta Hartsfield-jackson Intl Apt	LAX	Los Angeles International Apt	87	201807
WN	Southwest Airlines	ATL	Atlanta Hartsfield-jackson Intl Apt	MCI	Kansas City International Apt	111	201807
WN	Southwest Airlines	ATL	Atlanta Hartsfield-jackson Intl Apt	MCO	Orlando International Apt	170	201807
WN	Southwest Airlines	ATL	Atlanta Hartsfield-jackson Intl Apt	MDW	Chicago Midway Intl	180	201807
WN	Southwest Airlines	ATL	Atlanta Hartsfield-jackson Intl Apt	MKE	Milwaukee General Mitchell Intl Apt	58	201807
WN	Southwest Airlines	ATL	Atlanta Hartsfield-jackson Intl Apt	MSP	Minneapolis/St Paul International Apt	56	201807
WN	Southwest Airlines	ATL	Atlanta Hartsfield-jackson Intl Apt	MSY	New Orleans Louis Armstrong Intl Apt	116	201807
WN	Southwest Airlines	ATL	Atlanta Hartsfield-jackson Intl Apt	OAK	Oakland International Apt	38	201807
WN	Southwest Airlines	ATL	Atlanta Hartsfield-jackson Intl Apt	PHL	Philadelphia International Apt	83	201807
WN	Southwest Airlines	ATL	Atlanta Hartsfield-jackson Intl Apt	PHX	Phoenix Sky Harbor Intl Apt	56	201807
WN	Southwest Airlines	ATL	Atlanta Hartsfield-jackson Intl Apt	SAN	San Diego International	31	201807
WN	Southwest Airlines	ATL	Atlanta Hartsfield-jackson Intl Apt	SAT	San Antonio International Apt	62	201807
WN	Southwest Airlines	ATL	Atlanta Hartsfield-jackson Intl Apt	STL	St Louis Lambert Intl Apt	118	201807
WN	Southwest Airlines	AUS	Austin-Bergstrom International Apt	ABQ	Albuquerque	19	201807
WN	Southwest Airlines	AUS	Austin-Bergstrom International Apt	ATL	Atlanta Hartsfield-jackson Intl Apt	84	201807
WN	Southwest Airlines	AUS	Austin-Bergstrom International Apt	BNA	Nashville	96	201807
WN	Southwest Airlines	AUS	Austin-Bergstrom International Apt	BOS	Boston Edward L Logan Intl Apt	31	201807
WN	Southwest Airlines	AUS	Austin-Bergstrom International Apt	BWI	Baltimore Washington International Apt	61	201807
WN	Southwest Airlines	AUS	Austin-Bergstrom International Apt	CUN	Cancun	35	201807
WN	Southwest Airlines	AUS	Austin-Bergstrom International Apt	DEN	Denver Intl Apt	166	201807
WN	Southwest Airlines	AUS	Austin-Bergstrom International Apt	ELP	El Paso International Apt	82	201807
WN	Southwest Airlines	AUS	Austin-Bergstrom International Apt	EWR	Newark Liberty International Apt	58	201807
WN	Southwest Airlines	AUS	Austin-Bergstrom International Apt	FLL	Fort Lauderdale/Hollywood Intl Apt	62	201807
WN	Southwest Airlines	AUS	Austin-Bergstrom International Apt	HOU	Houston William P. Hobby Apt	155	201807
WN	Southwest Airlines	AUS	Austin-Bergstrom International Apt	IND	Indianapolis	5	201807
WN	Southwest Airlines	AUS	Austin-Bergstrom International Apt	LAS	Las Vegas McCarran International Apt	91	201807
WN	Southwest Airlines	AUS	Austin-Bergstrom International Apt	LAX	Los Angeles International Apt	86	201807
WN	Southwest Airlines	AUS	Austin-Bergstrom International Apt	MCI	Kansas City International Apt	31	201807
WN	Southwest Airlines	AUS	Austin-Bergstrom International Apt	MCO	Orlando International Apt	64	201807
WN	Southwest Airlines	AUS	Austin-Bergstrom International Apt	MDW	Chicago Midway Intl	87	201807
WN	Southwest Airlines	AUS	Austin-Bergstrom International Apt	MSY	New Orleans Louis Armstrong Intl Apt	58	201807
WN	Southwest Airlines	AUS	Austin-Bergstrom International Apt	OAK	Oakland International Apt	31	201807
WN	Southwest Airlines	AUS	Austin-Bergstrom International Apt	PDX	Portland International	27	201807
WN	Southwest Airlines	AUS	Austin-Bergstrom International Apt	PHX	Phoenix Sky Harbor Intl Apt	120	201807
WN	Southwest Airlines	AUS	Austin-Bergstrom International Apt	SAN	San Diego International	88	201807
WN	Southwest Airlines	AUS	Austin-Bergstrom International Apt	SFO	San Francisco	31	201807
WN	Southwest Airlines	AUS	Austin-Bergstrom International Apt	SJC	San Jose Norman Y. Mineta Intl	74	201807
WN	Southwest Airlines	AUS	Austin-Bergstrom International Apt	SMF	Sacramento International Apt	31	201807
WN	Southwest Airlines	AUS	Austin-Bergstrom International Apt	STL	St Louis Lambert Intl Apt	51	201807
WN	Southwest Airlines	BNA	Nashville	AUS	Austin-Bergstrom International Apt	96	201807
WN	Southwest Airlines	BNA	Nashville	BOS	Boston Edward L Logan Intl Apt	87	201807
WN	Southwest Airlines	BNA	Nashville	BWI	Baltimore Washington International Apt	181	201807
WN	Southwest Airlines	BNA	Nashville	CLE	Cleveland Hopkins International Apt	89	201807
WN	Southwest Airlines	BNA	Nashville	CLT	Charlotte	36	201807
WN	Southwest Airlines	BNA	Nashville	CMH	Columbus John Glenn Intl Apt	62	201807
WN	Southwest Airlines	BNA	Nashville	CUN	Cancun	4	201807
WN	Southwest Airlines	BNA	Nashville	DEN	Denver Intl Apt	155	201807
WN	Southwest Airlines	BNA	Nashville	DTW	Detroit Metropolitan Wayne County	62	201807
WN	Southwest Airlines	BNA	Nashville	FLL	Fort Lauderdale/Hollywood Intl Apt	104	201807
WN	Southwest Airlines	BNA	Nashville	HOU	Houston William P. Hobby Apt	116	201807
WN	Southwest Airlines	BNA	Nashville	LAS	Las Vegas McCarran International Apt	120	201807
WN	Southwest Airlines	BNA	Nashville	LAX	Los Angeles International Apt	89	201807
WN	Southwest Airlines	BNA	Nashville	MCI	Kansas City International Apt	121	201807
WN	Southwest Airlines	BNA	Nashville	MCO	Orlando International Apt	162	201807
WN	Southwest Airlines	BNA	Nashville	MDW	Chicago Midway Intl	203	201807
WN	Southwest Airlines	BNA	Nashville	MKE	Milwaukee General Mitchell Intl Apt	62	201807
WN	Southwest Airlines	BNA	Nashville	MSP	Minneapolis/St Paul International Apt	31	201807
WN	Southwest Airlines	BNA	Nashville	MSY	New Orleans Louis Armstrong Intl Apt	101	201807
WN	Southwest Airlines	BNA	Nashville	OAK	Oakland International Apt	31	201807
WN	Southwest Airlines	BNA	Nashville	PHL	Philadelphia International Apt	67	201807
WN	Southwest Airlines	BNA	Nashville	PHX	Phoenix Sky Harbor Intl Apt	95	201807
WN	Southwest Airlines	BNA	Nashville	SAN	San Diego International	60	201807
WN	Southwest Airlines	BNA	Nashville	SAT	San Antonio International Apt	60	201807
WN	Southwest Airlines	BNA	Nashville	SEA	Seattle-Tacoma International Apt	31	201807
WN	Southwest Airlines	BNA	Nashville	STL	St Louis Lambert Intl Apt	87	201807
WN	Southwest Airlines	BOI	Boise	DEN	Denver Intl Apt	71	201807
WN	Southwest Airlines	BOI	Boise	LAS	Las Vegas McCarran International Apt	60	201807
WN	Southwest Airlines	BOI	Boise	MDW	Chicago Midway Intl	31	201807
WN	Southwest Airlines	BOI	Boise	OAK	Oakland International Apt	62	201807
WN	Southwest Airlines	BOI	Boise	PHX	Phoenix Sky Harbor Intl Apt	31	201807
WN	Southwest Airlines	BOI	Boise	SAN	San Diego International	31	201807
WN	Southwest Airlines	BOI	Boise	SJC	San Jose Norman Y. Mineta Intl	31	201807
WN	Southwest Airlines	BOI	Boise	SMF	Sacramento International Apt	31	201807
WN	Southwest Airlines	BOS	Boston Edward L Logan Intl Apt	ATL	Atlanta Hartsfield-jackson Intl Apt	82	201807
WN	Southwest Airlines	BOS	Boston Edward L Logan Intl Apt	AUS	Austin-Bergstrom International Apt	31	201807
WN	Southwest Airlines	BOS	Boston Edward L Logan Intl Apt	BNA	Nashville	87	201807
WN	Southwest Airlines	BOS	Boston Edward L Logan Intl Apt	BWI	Baltimore Washington International Apt	271	201807
WN	Southwest Airlines	BOS	Boston Edward L Logan Intl Apt	CMH	Columbus John Glenn Intl Apt	56	201807
WN	Southwest Airlines	BOS	Boston Edward L Logan Intl Apt	DEN	Denver Intl Apt	93	201807
WN	Southwest Airlines	BOS	Boston Edward L Logan Intl Apt	HOU	Houston William P. Hobby Apt	56	201807
WN	Southwest Airlines	BOS	Boston Edward L Logan Intl Apt	IND	Indianapolis	53	201807
WN	Southwest Airlines	BOS	Boston Edward L Logan Intl Apt	MCI	Kansas City International Apt	60	201807
WN	Southwest Airlines	BOS	Boston Edward L Logan Intl Apt	MDW	Chicago Midway Intl	179	201807
WN	Southwest Airlines	BOS	Boston Edward L Logan Intl Apt	MKE	Milwaukee General Mitchell Intl Apt	51	201807
WN	Southwest Airlines	BOS	Boston Edward L Logan Intl Apt	MSY	New Orleans Louis Armstrong Intl Apt	4	201807
WN	Southwest Airlines	BOS	Boston Edward L Logan Intl Apt	STL	St Louis Lambert Intl Apt	109	201807
WN	Southwest Airlines	BWI	Baltimore Washington International Apt	ABQ	Albuquerque	66	201807
WN	Southwest Airlines	BWI	Baltimore Washington International Apt	ATL	Atlanta Hartsfield-jackson Intl Apt	174	201807
WN	Southwest Airlines	BWI	Baltimore Washington International Apt	AUS	Austin-Bergstrom International Apt	60	201807
WN	Southwest Airlines	BWI	Baltimore Washington International Apt	BNA	Nashville	180	201807
WN	Southwest Airlines	BWI	Baltimore Washington International Apt	BOS	Boston Edward L Logan Intl Apt	277	201807
WN	Southwest Airlines	BWI	Baltimore Washington International Apt	CLE	Cleveland Hopkins International Apt	111	201807
WN	Southwest Airlines	BWI	Baltimore Washington International Apt	CLT	Charlotte	80	201807
WN	Southwest Airlines	BWI	Baltimore Washington International Apt	CMH	Columbus John Glenn Intl Apt	113	201807
WN	Southwest Airlines	BWI	Baltimore Washington International Apt	CUN	Cancun	66	201807
WN	Southwest Airlines	BWI	Baltimore Washington International Apt	DEN	Denver Intl Apt	184	201807
WN	Southwest Airlines	BWI	Baltimore Washington International Apt	DTW	Detroit Metropolitan Wayne County	89	201807
WN	Southwest Airlines	BWI	Baltimore Washington International Apt	FLL	Fort Lauderdale/Hollywood Intl Apt	297	201807
WN	Southwest Airlines	BWI	Baltimore Washington International Apt	HOU	Houston William P. Hobby Apt	119	201807
WN	Southwest Airlines	BWI	Baltimore Washington International Apt	IND	Indianapolis	87	201807
WN	Southwest Airlines	BWI	Baltimore Washington International Apt	LAS	Las Vegas McCarran International Apt	176	201807
WN	Southwest Airlines	BWI	Baltimore Washington International Apt	LAX	Los Angeles International Apt	93	201807
WN	Southwest Airlines	BWI	Baltimore Washington International Apt	MCI	Kansas City International Apt	91	201807
WN	Southwest Airlines	BWI	Baltimore Washington International Apt	MCO	Orlando International Apt	292	201807
WN	Southwest Airlines	BWI	Baltimore Washington International Apt	MDW	Chicago Midway Intl	215	201807
WN	Southwest Airlines	BWI	Baltimore Washington International Apt	MKE	Milwaukee General Mitchell Intl Apt	87	201807
WN	Southwest Airlines	BWI	Baltimore Washington International Apt	MSP	Minneapolis/St Paul International Apt	62	201807
WN	Southwest Airlines	BWI	Baltimore Washington International Apt	MSY	New Orleans Louis Armstrong Intl Apt	110	201807
WN	Southwest Airlines	BWI	Baltimore Washington International Apt	OAK	Oakland International Apt	57	201807
WN	Southwest Airlines	BWI	Baltimore Washington International Apt	PDX	Portland International	31	201807
WN	Southwest Airlines	BWI	Baltimore Washington International Apt	PHX	Phoenix Sky Harbor Intl Apt	93	201807
WN	Southwest Airlines	BWI	Baltimore Washington International Apt	SAN	San Diego International	91	201807
WN	Southwest Airlines	BWI	Baltimore Washington International Apt	SAT	San Antonio International Apt	87	201807
WN	Southwest Airlines	BWI	Baltimore Washington International Apt	SEA	Seattle-Tacoma International Apt	31	201807
WN	Southwest Airlines	BWI	Baltimore Washington International Apt	SJC	San Jose Norman Y. Mineta Intl	31	201807
WN	Southwest Airlines	BWI	Baltimore Washington International Apt	SLC	Salt Lake City	57	201807
WN	Southwest Airlines	BWI	Baltimore Washington International Apt	SMF	Sacramento International Apt	31	201807
WN	Southwest Airlines	BWI	Baltimore Washington International Apt	STL	St Louis Lambert Intl Apt	129	201807
WN	Southwest Airlines	CLE	Cleveland Hopkins International Apt	ATL	Atlanta Hartsfield-jackson Intl Apt	58	201807
WN	Southwest Airlines	CLE	Cleveland Hopkins International Apt	BNA	Nashville	89	201807
WN	Southwest Airlines	CLE	Cleveland Hopkins International Apt	BWI	Baltimore Washington International Apt	109	201807
WN	Southwest Airlines	CLE	Cleveland Hopkins International Apt	DEN	Denver Intl Apt	32	201807
WN	Southwest Airlines	CLE	Cleveland Hopkins International Apt	LAS	Las Vegas McCarran International Apt	35	201807
WN	Southwest Airlines	CLE	Cleveland Hopkins International Apt	MCO	Orlando International Apt	4	201807
WN	Southwest Airlines	CLE	Cleveland Hopkins International Apt	MDW	Chicago Midway Intl	161	201807
WN	Southwest Airlines	CLE	Cleveland Hopkins International Apt	MKE	Milwaukee General Mitchell Intl Apt	58	201807
WN	Southwest Airlines	CLE	Cleveland Hopkins International Apt	PHX	Phoenix Sky Harbor Intl Apt	31	201807
WN	Southwest Airlines	CLE	Cleveland Hopkins International Apt	STL	St Louis Lambert Intl Apt	65	201807
WN	Southwest Airlines	CLT	Charlotte	BNA	Nashville	36	201807
WN	Southwest Airlines	CLT	Charlotte	BWI	Baltimore Washington International Apt	80	201807
WN	Southwest Airlines	CLT	Charlotte	HOU	Houston William P. Hobby Apt	53	201807
WN	Southwest Airlines	CLT	Charlotte	MDW	Chicago Midway Intl	62	201807
WN	Southwest Airlines	CMH	Columbus John Glenn Intl Apt	ATL	Atlanta Hartsfield-jackson Intl Apt	82	201807
WN	Southwest Airlines	CMH	Columbus John Glenn Intl Apt	BNA	Nashville	62	201807
WN	Southwest Airlines	CMH	Columbus John Glenn Intl Apt	BOS	Boston Edward L Logan Intl Apt	56	201807
WN	Southwest Airlines	CMH	Columbus John Glenn Intl Apt	BWI	Baltimore Washington International Apt	113	201807
WN	Southwest Airlines	CMH	Columbus John Glenn Intl Apt	CUN	Cancun	4	201807
WN	Southwest Airlines	CMH	Columbus John Glenn Intl Apt	DEN	Denver Intl Apt	66	201807
WN	Southwest Airlines	CMH	Columbus John Glenn Intl Apt	FLL	Fort Lauderdale/Hollywood Intl Apt	31	201807
WN	Southwest Airlines	CMH	Columbus John Glenn Intl Apt	LAS	Las Vegas McCarran International Apt	65	201807
WN	Southwest Airlines	CMH	Columbus John Glenn Intl Apt	MCO	Orlando International Apt	106	201807
WN	Southwest Airlines	CMH	Columbus John Glenn Intl Apt	MDW	Chicago Midway Intl	169	201807
WN	Southwest Airlines	CMH	Columbus John Glenn Intl Apt	MSY	New Orleans Louis Armstrong Intl Apt	9	201807
WN	Southwest Airlines	CMH	Columbus John Glenn Intl Apt	OAK	Oakland International Apt	31	201807
WN	Southwest Airlines	CMH	Columbus John Glenn Intl Apt	PHX	Phoenix Sky Harbor Intl Apt	51	201807
WN	Southwest Airlines	CMH	Columbus John Glenn Intl Apt	STL	St Louis Lambert Intl Apt	58	201807
WN	Southwest Airlines	CUN	Cancun	ATL	Atlanta Hartsfield-jackson Intl Apt	35	201807
WN	Southwest Airlines	CUN	Cancun	AUS	Austin-Bergstrom International Apt	35	201807
WN	Southwest Airlines	CUN	Cancun	BNA	Nashville	4	201807
WN	Southwest Airlines	CUN	Cancun	BWI	Baltimore Washington International Apt	66	201807
WN	Southwest Airlines	CUN	Cancun	CMH	Columbus John Glenn Intl Apt	4	201807
WN	Southwest Airlines	CUN	Cancun	DEN	Denver Intl Apt	40	201807
WN	Southwest Airlines	CUN	Cancun	FLL	Fort Lauderdale/Hollywood Intl Apt	93	201807
WN	Southwest Airlines	CUN	Cancun	HOU	Houston William P. Hobby Apt	66	201807
WN	Southwest Airlines	CUN	Cancun	IND	Indianapolis	4	201807
WN	Southwest Airlines	CUN	Cancun	LAX	Los Angeles International Apt	31	201807
WN	Southwest Airlines	CUN	Cancun	MDW	Chicago Midway Intl	66	201807
WN	Southwest Airlines	CUN	Cancun	MSY	New Orleans Louis Armstrong Intl Apt	4	201807
WN	Southwest Airlines	CUN	Cancun	SAT	San Antonio International Apt	32	201807
WN	Southwest Airlines	CUN	Cancun	STL	St Louis Lambert Intl Apt	4	201807
WN	Southwest Airlines	DEN	Denver Intl Apt	ABQ	Albuquerque	87	201807
WN	Southwest Airlines	DEN	Denver Intl Apt	ATL	Atlanta Hartsfield-jackson Intl Apt	148	201807
WN	Southwest Airlines	DEN	Denver Intl Apt	AUS	Austin-Bergstrom International Apt	168	201807
WN	Southwest Airlines	DEN	Denver Intl Apt	BNA	Nashville	151	201807
WN	Southwest Airlines	DEN	Denver Intl Apt	BOI	Boise	71	201807
WN	Southwest Airlines	DEN	Denver Intl Apt	BOS	Boston Edward L Logan Intl Apt	93	201807
WN	Southwest Airlines	DEN	Denver Intl Apt	BWI	Baltimore Washington International Apt	186	201807
WN	Southwest Airlines	DEN	Denver Intl Apt	CLE	Cleveland Hopkins International Apt	32	201807
WN	Southwest Airlines	DEN	Denver Intl Apt	CMH	Columbus John Glenn Intl Apt	66	201807
WN	Southwest Airlines	DEN	Denver Intl Apt	CUN	Cancun	40	201807
WN	Southwest Airlines	DEN	Denver Intl Apt	DTW	Detroit Metropolitan Wayne County	57	201807
WN	Southwest Airlines	DEN	Denver Intl Apt	EWR	Newark Liberty International Apt	58	201807
WN	Southwest Airlines	DEN	Denver Intl Apt	FLL	Fort Lauderdale/Hollywood Intl Apt	44	201807
WN	Southwest Airlines	DEN	Denver Intl Apt	HOU	Houston William P. Hobby Apt	182	201807
WN	Southwest Airlines	DEN	Denver Intl Apt	IAD	Washington Dulles International Apt	87	201807
WN	Southwest Airlines	DEN	Denver Intl Apt	IND	Indianapolis	118	201807
WN	Southwest Airlines	DEN	Denver Intl Apt	LAS	Las Vegas McCarran International Apt	285	201807
WN	Southwest Airlines	DEN	Denver Intl Apt	LAX	Los Angeles International Apt	233	201807
WN	Southwest Airlines	DEN	Denver Intl Apt	MCI	Kansas City International Apt	208	201807
WN	Southwest Airlines	DEN	Denver Intl Apt	MCO	Orlando International Apt	124	201807
WN	Southwest Airlines	DEN	Denver Intl Apt	MDW	Chicago Midway Intl	271	201807
WN	Southwest Airlines	DEN	Denver Intl Apt	MKE	Milwaukee General Mitchell Intl Apt	115	201807
WN	Southwest Airlines	DEN	Denver Intl Apt	MSP	Minneapolis/St Paul International Apt	149	201807
WN	Southwest Airlines	DEN	Denver Intl Apt	MSY	New Orleans Louis Armstrong Intl Apt	67	201807
WN	Southwest Airlines	DEN	Denver Intl Apt	OAK	Oakland International Apt	142	201807
WN	Southwest Airlines	DEN	Denver Intl Apt	PDX	Portland International	125	201807
WN	Southwest Airlines	DEN	Denver Intl Apt	PHL	Philadelphia International Apt	66	201807
WN	Southwest Airlines	DEN	Denver Intl Apt	PHX	Phoenix Sky Harbor Intl Apt	275	201807
WN	Southwest Airlines	DEN	Denver Intl Apt	RNO	Reno	65	201807
WN	Southwest Airlines	DEN	Denver Intl Apt	SAN	San Diego International	184	201807
WN	Southwest Airlines	DEN	Denver Intl Apt	SAT	San Antonio International Apt	93	201807
WN	Southwest Airlines	DEN	Denver Intl Apt	SEA	Seattle-Tacoma International Apt	144	201807
WN	Southwest Airlines	DEN	Denver Intl Apt	SFO	San Francisco	141	201807
WN	Southwest Airlines	DEN	Denver Intl Apt	SJC	San Jose Norman Y. Mineta Intl	120	201807
WN	Southwest Airlines	DEN	Denver Intl Apt	SLC	Salt Lake City	171	201807
WN	Southwest Airlines	DEN	Denver Intl Apt	SMF	Sacramento International Apt	146	201807
WN	Southwest Airlines	DEN	Denver Intl Apt	STL	St Louis Lambert Intl Apt	156	201807
WN	Southwest Airlines	DEN	Denver Intl Apt	TUL	Tulsa International Apt	62	201807
WN	Southwest Airlines	DEN	Denver Intl Apt	TUS	Tucson International Apt	60	201807
WN	Southwest Airlines	DTW	Detroit Metropolitan Wayne County	ATL	Atlanta Hartsfield-jackson Intl Apt	88	201807
WN	Southwest Airlines	DTW	Detroit Metropolitan Wayne County	BNA	Nashville	62	201807
WN	Southwest Airlines	DTW	Detroit Metropolitan Wayne County	BWI	Baltimore Washington International Apt	89	201807
WN	Southwest Airlines	DTW	Detroit Metropolitan Wayne County	DEN	Denver Intl Apt	57	201807
WN	Southwest Airlines	DTW	Detroit Metropolitan Wayne County	LAS	Las Vegas McCarran International Apt	31	201807
WN	Southwest Airlines	DTW	Detroit Metropolitan Wayne County	MDW	Chicago Midway Intl	135	201807
WN	Southwest Airlines	DTW	Detroit Metropolitan Wayne County	PHX	Phoenix Sky Harbor Intl Apt	57	201807
WN	Southwest Airlines	DTW	Detroit Metropolitan Wayne County	STL	St Louis Lambert Intl Apt	63	201807
WN	Southwest Airlines	ELP	El Paso International Apt	AUS	Austin-Bergstrom International Apt	82	201807
WN	Southwest Airlines	ELP	El Paso International Apt	HOU	Houston William P. Hobby Apt	93	201807
WN	Southwest Airlines	ELP	El Paso International Apt	LAS	Las Vegas McCarran International Apt	65	201807
WN	Southwest Airlines	ELP	El Paso International Apt	LAX	Los Angeles International Apt	62	201807
WN	Southwest Airlines	ELP	El Paso International Apt	PHX	Phoenix Sky Harbor Intl Apt	111	201807
WN	Southwest Airlines	ELP	El Paso International Apt	SAN	San Diego International	5	201807
WN	Southwest Airlines	ELP	El Paso International Apt	SAT	San Antonio International Apt	87	201807
WN	Southwest Airlines	EWR	Newark Liberty International Apt	AUS	Austin-Bergstrom International Apt	58	201807
WN	Southwest Airlines	EWR	Newark Liberty International Apt	DEN	Denver Intl Apt	58	201807
WN	Southwest Airlines	EWR	Newark Liberty International Apt	FLL	Fort Lauderdale/Hollywood Intl Apt	58	201807
WN	Southwest Airlines	EWR	Newark Liberty International Apt	IND	Indianapolis	53	201807
WN	Southwest Airlines	EWR	Newark Liberty International Apt	MCO	Orlando International Apt	36	201807
WN	Southwest Airlines	EWR	Newark Liberty International Apt	MDW	Chicago Midway Intl	174	201807
WN	Southwest Airlines	EWR	Newark Liberty International Apt	OAK	Oakland International Apt	31	201807
WN	Southwest Airlines	EWR	Newark Liberty International Apt	PHX	Phoenix Sky Harbor Intl Apt	31	201807
WN	Southwest Airlines	EWR	Newark Liberty International Apt	SAN	San Diego International	31	201807
WN	Southwest Airlines	EWR	Newark Liberty International Apt	STL	St Louis Lambert Intl Apt	62	201807
WN	Southwest Airlines	FLL	Fort Lauderdale/Hollywood Intl Apt	ATL	Atlanta Hartsfield-jackson Intl Apt	153	201807
WN	Southwest Airlines	FLL	Fort Lauderdale/Hollywood Intl Apt	AUS	Austin-Bergstrom International Apt	62	201807
WN	Southwest Airlines	FLL	Fort Lauderdale/Hollywood Intl Apt	BNA	Nashville	104	201807
WN	Southwest Airlines	FLL	Fort Lauderdale/Hollywood Intl Apt	BWI	Baltimore Washington International Apt	297	201807
WN	Southwest Airlines	FLL	Fort Lauderdale/Hollywood Intl Apt	CMH	Columbus John Glenn Intl Apt	31	201807
WN	Southwest Airlines	FLL	Fort Lauderdale/Hollywood Intl Apt	CUN	Cancun	93	201807
WN	Southwest Airlines	FLL	Fort Lauderdale/Hollywood Intl Apt	DEN	Denver Intl Apt	44	201807
WN	Southwest Airlines	FLL	Fort Lauderdale/Hollywood Intl Apt	EWR	Newark Liberty International Apt	58	201807
WN	Southwest Airlines	FLL	Fort Lauderdale/Hollywood Intl Apt	HOU	Houston William P. Hobby Apt	72	201807
WN	Southwest Airlines	FLL	Fort Lauderdale/Hollywood Intl Apt	IAD	Washington Dulles International Apt	31	201807
WN	Southwest Airlines	FLL	Fort Lauderdale/Hollywood Intl Apt	IND	Indianapolis	35	201807
WN	Southwest Airlines	FLL	Fort Lauderdale/Hollywood Intl Apt	LAS	Las Vegas McCarran International Apt	31	201807
WN	Southwest Airlines	FLL	Fort Lauderdale/Hollywood Intl Apt	MCI	Kansas City International Apt	31	201807
WN	Southwest Airlines	FLL	Fort Lauderdale/Hollywood Intl Apt	MCO	Orlando International Apt	153	201807
WN	Southwest Airlines	FLL	Fort Lauderdale/Hollywood Intl Apt	MDW	Chicago Midway Intl	122	201807
WN	Southwest Airlines	FLL	Fort Lauderdale/Hollywood Intl Apt	MSY	New Orleans Louis Armstrong Intl Apt	66	201807
WN	Southwest Airlines	FLL	Fort Lauderdale/Hollywood Intl Apt	PHL	Philadelphia International Apt	31	201807
WN	Southwest Airlines	FLL	Fort Lauderdale/Hollywood Intl Apt	PHX	Phoenix Sky Harbor Intl Apt	31	201807
WN	Southwest Airlines	FLL	Fort Lauderdale/Hollywood Intl Apt	SAT	San Antonio International Apt	24	201807
WN	Southwest Airlines	FLL	Fort Lauderdale/Hollywood Intl Apt	STL	St Louis Lambert Intl Apt	64	201807
WN	Southwest Airlines	HOU	Houston William P. Hobby Apt	ABQ	Albuquerque	87	201807
WN	Southwest Airlines	HOU	Houston William P. Hobby Apt	ATL	Atlanta Hartsfield-jackson Intl Apt	178	201807
WN	Southwest Airlines	HOU	Houston William P. Hobby Apt	AUS	Austin-Bergstrom International Apt	153	201807
WN	Southwest Airlines	HOU	Houston William P. Hobby Apt	BNA	Nashville	118	201807
WN	Southwest Airlines	HOU	Houston William P. Hobby Apt	BOS	Boston Edward L Logan Intl Apt	56	201807
WN	Southwest Airlines	HOU	Houston William P. Hobby Apt	BWI	Baltimore Washington International Apt	119	201807
WN	Southwest Airlines	HOU	Houston William P. Hobby Apt	CLT	Charlotte	53	201807
WN	Southwest Airlines	HOU	Houston William P. Hobby Apt	CUN	Cancun	66	201807
WN	Southwest Airlines	HOU	Houston William P. Hobby Apt	DEN	Denver Intl Apt	182	201807
WN	Southwest Airlines	HOU	Houston William P. Hobby Apt	ELP	El Paso International Apt	93	201807
WN	Southwest Airlines	HOU	Houston William P. Hobby Apt	FLL	Fort Lauderdale/Hollywood Intl Apt	72	201807
WN	Southwest Airlines	HOU	Houston William P. Hobby Apt	IND	Indianapolis	62	201807
WN	Southwest Airlines	HOU	Houston William P. Hobby Apt	LAS	Las Vegas McCarran International Apt	151	201807
WN	Southwest Airlines	HOU	Houston William P. Hobby Apt	LAX	Los Angeles International Apt	155	201807
WN	Southwest Airlines	HOU	Houston William P. Hobby Apt	MCI	Kansas City International Apt	82	201807
WN	Southwest Airlines	HOU	Houston William P. Hobby Apt	MCO	Orlando International Apt	146	201807
WN	Southwest Airlines	HOU	Houston William P. Hobby Apt	MDW	Chicago Midway Intl	189	201807
WN	Southwest Airlines	HOU	Houston William P. Hobby Apt	MKE	Milwaukee General Mitchell Intl Apt	31	201807
WN	Southwest Airlines	HOU	Houston William P. Hobby Apt	MSY	New Orleans Louis Armstrong Intl Apt	280	201807
WN	Southwest Airlines	HOU	Houston William P. Hobby Apt	OAK	Oakland International Apt	62	201807
WN	Southwest Airlines	HOU	Houston William P. Hobby Apt	PDX	Portland International	31	201807
WN	Southwest Airlines	HOU	Houston William P. Hobby Apt	PHX	Phoenix Sky Harbor Intl Apt	144	201807
WN	Southwest Airlines	HOU	Houston William P. Hobby Apt	SAN	San Diego International	64	201807
WN	Southwest Airlines	HOU	Houston William P. Hobby Apt	SAT	San Antonio International Apt	153	201807
WN	Southwest Airlines	HOU	Houston William P. Hobby Apt	SEA	Seattle-Tacoma International Apt	31	201807
WN	Southwest Airlines	HOU	Houston William P. Hobby Apt	SJC	San Jose Norman Y. Mineta Intl	31	201807
WN	Southwest Airlines	HOU	Houston William P. Hobby Apt	SLC	Salt Lake City	4	201807
WN	Southwest Airlines	HOU	Houston William P. Hobby Apt	STL	St Louis Lambert Intl Apt	120	201807
WN	Southwest Airlines	HOU	Houston William P. Hobby Apt	TUL	Tulsa International Apt	87	201807
WN	Southwest Airlines	IAD	Washington Dulles International Apt	ATL	Atlanta Hartsfield-jackson Intl Apt	58	201807
WN	Southwest Airlines	IAD	Washington Dulles International Apt	DEN	Denver Intl Apt	87	201807
WN	Southwest Airlines	IAD	Washington Dulles International Apt	FLL	Fort Lauderdale/Hollywood Intl Apt	31	201807
WN	Southwest Airlines	IAD	Washington Dulles International Apt	MCO	Orlando International Apt	31	201807
WN	Southwest Airlines	IND	Indianapolis	ATL	Atlanta Hartsfield-jackson Intl Apt	87	201807
WN	Southwest Airlines	IND	Indianapolis	AUS	Austin-Bergstrom International Apt	5	201807
WN	Southwest Airlines	IND	Indianapolis	BOS	Boston Edward L Logan Intl Apt	51	201807
WN	Southwest Airlines	IND	Indianapolis	BWI	Baltimore Washington International Apt	87	201807
WN	Southwest Airlines	IND	Indianapolis	CUN	Cancun	4	201807
WN	Southwest Airlines	IND	Indianapolis	DEN	Denver Intl Apt	118	201807
WN	Southwest Airlines	IND	Indianapolis	EWR	Newark Liberty International Apt	53	201807
WN	Southwest Airlines	IND	Indianapolis	FLL	Fort Lauderdale/Hollywood Intl Apt	35	201807
WN	Southwest Airlines	IND	Indianapolis	HOU	Houston William P. Hobby Apt	62	201807
WN	Southwest Airlines	IND	Indianapolis	LAS	Las Vegas McCarran International Apt	87	201807
WN	Southwest Airlines	IND	Indianapolis	LAX	Los Angeles International Apt	31	201807
WN	Southwest Airlines	IND	Indianapolis	MCI	Kansas City International Apt	51	201807
WN	Southwest Airlines	IND	Indianapolis	MCO	Orlando International Apt	124	201807
WN	Southwest Airlines	IND	Indianapolis	MDW	Chicago Midway Intl	53	201807
WN	Southwest Airlines	IND	Indianapolis	MSY	New Orleans Louis Armstrong Intl Apt	5	201807
WN	Southwest Airlines	IND	Indianapolis	OAK	Oakland International Apt	17	201807
WN	Southwest Airlines	IND	Indianapolis	PHX	Phoenix Sky Harbor Intl Apt	62	201807
WN	Southwest Airlines	IND	Indianapolis	SAN	San Diego International	31	201807
WN	Southwest Airlines	LAS	Las Vegas McCarran International Apt	ABQ	Albuquerque	118	201807
WN	Southwest Airlines	LAS	Las Vegas McCarran International Apt	ATL	Atlanta Hartsfield-jackson Intl Apt	118	201807
WN	Southwest Airlines	LAS	Las Vegas McCarran International Apt	AUS	Austin-Bergstrom International Apt	91	201807
WN	Southwest Airlines	LAS	Las Vegas McCarran International Apt	BNA	Nashville	120	201807
WN	Southwest Airlines	LAS	Las Vegas McCarran International Apt	BOI	Boise	62	201807
WN	Southwest Airlines	LAS	Las Vegas McCarran International Apt	BWI	Baltimore Washington International Apt	176	201807
WN	Southwest Airlines	LAS	Las Vegas McCarran International Apt	CLE	Cleveland Hopkins International Apt	35	201807
WN	Southwest Airlines	LAS	Las Vegas McCarran International Apt	CMH	Columbus John Glenn Intl Apt	65	201807
WN	Southwest Airlines	LAS	Las Vegas McCarran International Apt	DEN	Denver Intl Apt	285	201807
WN	Southwest Airlines	LAS	Las Vegas McCarran International Apt	DTW	Detroit Metropolitan Wayne County	31	201807
WN	Southwest Airlines	LAS	Las Vegas McCarran International Apt	ELP	El Paso International Apt	67	201807
WN	Southwest Airlines	LAS	Las Vegas McCarran International Apt	FLL	Fort Lauderdale/Hollywood Intl Apt	31	201807
WN	Southwest Airlines	LAS	Las Vegas McCarran International Apt	HOU	Houston William P. Hobby Apt	149	201807
WN	Southwest Airlines	LAS	Las Vegas McCarran International Apt	IND	Indianapolis	87	201807
WN	Southwest Airlines	LAS	Las Vegas McCarran International Apt	LAX	Los Angeles International Apt	302	201807
WN	Southwest Airlines	LAS	Las Vegas McCarran International Apt	MCI	Kansas City International Apt	118	201807
WN	Southwest Airlines	LAS	Las Vegas McCarran International Apt	MCO	Orlando International Apt	64	201807
WN	Southwest Airlines	LAS	Las Vegas McCarran International Apt	MDW	Chicago Midway Intl	271	201807
WN	Southwest Airlines	LAS	Las Vegas McCarran International Apt	MKE	Milwaukee General Mitchell Intl Apt	109	201807
WN	Southwest Airlines	LAS	Las Vegas McCarran International Apt	MSY	New Orleans Louis Armstrong Intl Apt	62	201807
WN	Southwest Airlines	LAS	Las Vegas McCarran International Apt	OAK	Oakland International Apt	258	201807
WN	Southwest Airlines	LAS	Las Vegas McCarran International Apt	PDX	Portland International	129	201807
WN	Southwest Airlines	LAS	Las Vegas McCarran International Apt	PHL	Philadelphia International Apt	31	201807
WN	Southwest Airlines	LAS	Las Vegas McCarran International Apt	PHX	Phoenix Sky Harbor Intl Apt	307	201807
WN	Southwest Airlines	LAS	Las Vegas McCarran International Apt	RNO	Reno	287	201807
WN	Southwest Airlines	LAS	Las Vegas McCarran International Apt	SAN	San Diego International	324	201807
WN	Southwest Airlines	LAS	Las Vegas McCarran International Apt	SAT	San Antonio International Apt	124	201807
WN	Southwest Airlines	LAS	Las Vegas McCarran International Apt	SEA	Seattle-Tacoma International Apt	89	201807
WN	Southwest Airlines	LAS	Las Vegas McCarran International Apt	SFO	San Francisco	189	201807
WN	Southwest Airlines	LAS	Las Vegas McCarran International Apt	SJC	San Jose Norman Y. Mineta Intl	259	201807
WN	Southwest Airlines	LAS	Las Vegas McCarran International Apt	SLC	Salt Lake City	139	201807
WN	Southwest Airlines	LAS	Las Vegas McCarran International Apt	SMF	Sacramento International Apt	241	201807
WN	Southwest Airlines	LAS	Las Vegas McCarran International Apt	STL	St Louis Lambert Intl Apt	123	201807
WN	Southwest Airlines	LAS	Las Vegas McCarran International Apt	TUL	Tulsa International Apt	31	201807
WN	Southwest Airlines	LAS	Las Vegas McCarran International Apt	TUS	Tucson International Apt	89	201807
WN	Southwest Airlines	LAX	Los Angeles International Apt	ABQ	Albuquerque	67	201807
WN	Southwest Airlines	LAX	Los Angeles International Apt	ATL	Atlanta Hartsfield-jackson Intl Apt	89	201807
WN	Southwest Airlines	LAX	Los Angeles International Apt	AUS	Austin-Bergstrom International Apt	86	201807
WN	Southwest Airlines	LAX	Los Angeles International Apt	BNA	Nashville	88	201807
WN	Southwest Airlines	LAX	Los Angeles International Apt	BWI	Baltimore Washington International Apt	93	201807
WN	Southwest Airlines	LAX	Los Angeles International Apt	CUN	Cancun	31	201807
WN	Southwest Airlines	LAX	Los Angeles International Apt	DEN	Denver Intl Apt	231	201807
WN	Southwest Airlines	LAX	Los Angeles International Apt	ELP	El Paso International Apt	62	201807
WN	Southwest Airlines	LAX	Los Angeles International Apt	HOU	Houston William P. Hobby Apt	155	201807
WN	Southwest Airlines	LAX	Los Angeles International Apt	IND	Indianapolis	31	201807
WN	Southwest Airlines	LAX	Los Angeles International Apt	LAS	Las Vegas McCarran International Apt	302	201807
WN	Southwest Airlines	LAX	Los Angeles International Apt	MCI	Kansas City International Apt	91	201807
WN	Southwest Airlines	LAX	Los Angeles International Apt	MDW	Chicago Midway Intl	180	201807
WN	Southwest Airlines	LAX	Los Angeles International Apt	MKE	Milwaukee General Mitchell Intl Apt	31	201807
WN	Southwest Airlines	LAX	Los Angeles International Apt	MSY	New Orleans Louis Armstrong Intl Apt	62	201807
WN	Southwest Airlines	LAX	Los Angeles International Apt	OAK	Oakland International Apt	377	201807
WN	Southwest Airlines	LAX	Los Angeles International Apt	PDX	Portland International	58	201807
WN	Southwest Airlines	LAX	Los Angeles International Apt	PHX	Phoenix Sky Harbor Intl Apt	259	201807
WN	Southwest Airlines	LAX	Los Angeles International Apt	RNO	Reno	82	201807
WN	Southwest Airlines	LAX	Los Angeles International Apt	SAT	San Antonio International Apt	62	201807
WN	Southwest Airlines	LAX	Los Angeles International Apt	SFO	San Francisco	263	201807
WN	Southwest Airlines	LAX	Los Angeles International Apt	SJC	San Jose Norman Y. Mineta Intl	314	201807
WN	Southwest Airlines	LAX	Los Angeles International Apt	SLC	Salt Lake City	82	201807
WN	Southwest Airlines	LAX	Los Angeles International Apt	SMF	Sacramento International Apt	248	201807
WN	Southwest Airlines	LAX	Los Angeles International Apt	STL	St Louis Lambert Intl Apt	93	201807
WN	Southwest Airlines	LAX	Los Angeles International Apt	TUS	Tucson International Apt	84	201807
WN	Southwest Airlines	MCI	Kansas City International Apt	ABQ	Albuquerque	31	201807
WN	Southwest Airlines	MCI	Kansas City International Apt	ATL	Atlanta Hartsfield-jackson Intl Apt	109	201807
WN	Southwest Airlines	MCI	Kansas City International Apt	AUS	Austin-Bergstrom International Apt	31	201807
WN	Southwest Airlines	MCI	Kansas City International Apt	BNA	Nashville	121	201807
WN	Southwest Airlines	MCI	Kansas City International Apt	BOS	Boston Edward L Logan Intl Apt	60	201807
WN	Southwest Airlines	MCI	Kansas City International Apt	BWI	Baltimore Washington International Apt	91	201807
WN	Southwest Airlines	MCI	Kansas City International Apt	DEN	Denver Intl Apt	208	201807
WN	Southwest Airlines	MCI	Kansas City International Apt	FLL	Fort Lauderdale/Hollywood Intl Apt	31	201807
WN	Southwest Airlines	MCI	Kansas City International Apt	HOU	Houston William P. Hobby Apt	82	201807
WN	Southwest Airlines	MCI	Kansas City International Apt	IND	Indianapolis	51	201807
WN	Southwest Airlines	MCI	Kansas City International Apt	LAS	Las Vegas McCarran International Apt	120	201807
WN	Southwest Airlines	MCI	Kansas City International Apt	LAX	Los Angeles International Apt	91	201807
WN	Southwest Airlines	MCI	Kansas City International Apt	MCO	Orlando International Apt	123	201807
WN	Southwest Airlines	MCI	Kansas City International Apt	MDW	Chicago Midway Intl	252	201807
WN	Southwest Airlines	MCI	Kansas City International Apt	MKE	Milwaukee General Mitchell Intl Apt	51	201807
WN	Southwest Airlines	MCI	Kansas City International Apt	MSP	Minneapolis/St Paul International Apt	54	201807
WN	Southwest Airlines	MCI	Kansas City International Apt	MSY	New Orleans Louis Armstrong Intl Apt	36	201807
WN	Southwest Airlines	MCI	Kansas City International Apt	OAK	Oakland International Apt	56	201807
WN	Southwest Airlines	MCI	Kansas City International Apt	PDX	Portland International	32	201807
WN	Southwest Airlines	MCI	Kansas City International Apt	PHX	Phoenix Sky Harbor Intl Apt	93	201807
WN	Southwest Airlines	MCI	Kansas City International Apt	SAN	San Diego International	58	201807
WN	Southwest Airlines	MCI	Kansas City International Apt	SAT	San Antonio International Apt	32	201807
WN	Southwest Airlines	MCI	Kansas City International Apt	SEA	Seattle-Tacoma International Apt	31	201807
WN	Southwest Airlines	MCI	Kansas City International Apt	STL	St Louis Lambert Intl Apt	109	201807
WN	Southwest Airlines	MCO	Orlando International Apt	ABQ	Albuquerque	9	201807
WN	Southwest Airlines	MCO	Orlando International Apt	ATL	Atlanta Hartsfield-jackson Intl Apt	168	201807
WN	Southwest Airlines	MCO	Orlando International Apt	AUS	Austin-Bergstrom International Apt	64	201807
WN	Southwest Airlines	MCO	Orlando International Apt	BNA	Nashville	162	201807
WN	Southwest Airlines	MCO	Orlando International Apt	BWI	Baltimore Washington International Apt	292	201807
WN	Southwest Airlines	MCO	Orlando International Apt	CLE	Cleveland Hopkins International Apt	4	201807
WN	Southwest Airlines	MCO	Orlando International Apt	CMH	Columbus John Glenn Intl Apt	106	201807
WN	Southwest Airlines	MCO	Orlando International Apt	DEN	Denver Intl Apt	124	201807
WN	Southwest Airlines	MCO	Orlando International Apt	EWR	Newark Liberty International Apt	36	201807
WN	Southwest Airlines	MCO	Orlando International Apt	FLL	Fort Lauderdale/Hollywood Intl Apt	151	201807
WN	Southwest Airlines	MCO	Orlando International Apt	HOU	Houston William P. Hobby Apt	146	201807
WN	Southwest Airlines	MCO	Orlando International Apt	IAD	Washington Dulles International Apt	31	201807
WN	Southwest Airlines	MCO	Orlando International Apt	IND	Indianapolis	124	201807
WN	Southwest Airlines	MCO	Orlando International Apt	LAS	Las Vegas McCarran International Apt	64	201807
WN	Southwest Airlines	MCO	Orlando International Apt	MCI	Kansas City International Apt	123	201807
WN	Southwest Airlines	MCO	Orlando International Apt	MDW	Chicago Midway Intl	265	201807
WN	Southwest Airlines	MCO	Orlando International Apt	MKE	Milwaukee General Mitchell Intl Apt	97	201807
WN	Southwest Airlines	MCO	Orlando International Apt	MSY	New Orleans Louis Armstrong Intl Apt	125	201807
WN	Southwest Airlines	MCO	Orlando International Apt	OAK	Oakland International Apt	19	201807
WN	Southwest Airlines	MCO	Orlando International Apt	PHL	Philadelphia International Apt	101	201807
WN	Southwest Airlines	MCO	Orlando International Apt	PHX	Phoenix Sky Harbor Intl Apt	44	201807
WN	Southwest Airlines	MCO	Orlando International Apt	SAN	San Diego International	31	201807
WN	Southwest Airlines	MCO	Orlando International Apt	SAT	San Antonio International Apt	70	201807
WN	Southwest Airlines	MCO	Orlando International Apt	SJC	San Jose Norman Y. Mineta Intl	31	201807
WN	Southwest Airlines	MCO	Orlando International Apt	SMF	Sacramento International Apt	31	201807
WN	Southwest Airlines	MCO	Orlando International Apt	STL	St Louis Lambert Intl Apt	139	201807
WN	Southwest Airlines	MCO	Orlando International Apt	TUL	Tulsa International Apt	4	201807
WN	Southwest Airlines	MDW	Chicago Midway Intl	ABQ	Albuquerque	71	201807
WN	Southwest Airlines	MDW	Chicago Midway Intl	ATL	Atlanta Hartsfield-jackson Intl Apt	176	201807
WN	Southwest Airlines	MDW	Chicago Midway Intl	AUS	Austin-Bergstrom International Apt	87	201807
WN	Southwest Airlines	MDW	Chicago Midway Intl	BNA	Nashville	205	201807
WN	Southwest Airlines	MDW	Chicago Midway Intl	BOI	Boise	31	201807
WN	Southwest Airlines	MDW	Chicago Midway Intl	BOS	Boston Edward L Logan Intl Apt	177	201807
WN	Southwest Airlines	MDW	Chicago Midway Intl	BWI	Baltimore Washington International Apt	215	201807
WN	Southwest Airlines	MDW	Chicago Midway Intl	CLE	Cleveland Hopkins International Apt	161	201807
WN	Southwest Airlines	MDW	Chicago Midway Intl	CLT	Charlotte	62	201807
WN	Southwest Airlines	MDW	Chicago Midway Intl	CMH	Columbus John Glenn Intl Apt	169	201807
WN	Southwest Airlines	MDW	Chicago Midway Intl	CUN	Cancun	66	201807
WN	Southwest Airlines	MDW	Chicago Midway Intl	DEN	Denver Intl Apt	271	201807
WN	Southwest Airlines	MDW	Chicago Midway Intl	DTW	Detroit Metropolitan Wayne County	135	201807
WN	Southwest Airlines	MDW	Chicago Midway Intl	EWR	Newark Liberty International Apt	174	201807
WN	Southwest Airlines	MDW	Chicago Midway Intl	FLL	Fort Lauderdale/Hollywood Intl Apt	122	201807
WN	Southwest Airlines	MDW	Chicago Midway Intl	HOU	Houston William P. Hobby Apt	189	201807
WN	Southwest Airlines	MDW	Chicago Midway Intl	IND	Indianapolis	54	201807
WN	Southwest Airlines	MDW	Chicago Midway Intl	LAS	Las Vegas McCarran International Apt	271	201807
WN	Southwest Airlines	MDW	Chicago Midway Intl	LAX	Los Angeles International Apt	182	201807
WN	Southwest Airlines	MDW	Chicago Midway Intl	MCI	Kansas City International Apt	254	201807
WN	Southwest Airlines	MDW	Chicago Midway Intl	MCO	Orlando International Apt	261	201807
WN	Southwest Airlines	MDW	Chicago Midway Intl	MSP	Minneapolis/St Paul International Apt	222	201807
WN	Southwest Airlines	MDW	Chicago Midway Intl	MSY	New Orleans Louis Armstrong Intl Apt	108	201807
WN	Southwest Airlines	MDW	Chicago Midway Intl	OAK	Oakland International Apt	113	201807
WN	Southwest Airlines	MDW	Chicago Midway Intl	PDX	Portland International	88	201807
WN	Southwest Airlines	MDW	Chicago Midway Intl	PHL	Philadelphia International Apt	182	201807
WN	Southwest Airlines	MDW	Chicago Midway Intl	PHX	Phoenix Sky Harbor Intl Apt	222	201807
WN	Southwest Airlines	MDW	Chicago Midway Intl	RNO	Reno	35	201807
WN	Southwest Airlines	MDW	Chicago Midway Intl	SAN	San Diego International	124	201807
WN	Southwest Airlines	MDW	Chicago Midway Intl	SAT	San Antonio International Apt	89	201807
WN	Southwest Airlines	MDW	Chicago Midway Intl	SEA	Seattle-Tacoma International Apt	145	201807
WN	Southwest Airlines	MDW	Chicago Midway Intl	SFO	San Francisco	88	201807
WN	Southwest Airlines	MDW	Chicago Midway Intl	SJC	San Jose Norman Y. Mineta Intl	53	201807
WN	Southwest Airlines	MDW	Chicago Midway Intl	SLC	Salt Lake City	62	201807
WN	Southwest Airlines	MDW	Chicago Midway Intl	SMF	Sacramento International Apt	61	201807
WN	Southwest Airlines	MDW	Chicago Midway Intl	STL	St Louis Lambert Intl Apt	218	201807
WN	Southwest Airlines	MDW	Chicago Midway Intl	TUS	Tucson International Apt	31	201807
WN	Southwest Airlines	MKE	Milwaukee General Mitchell Intl Apt	ATL	Atlanta Hartsfield-jackson Intl Apt	58	201807
WN	Southwest Airlines	MKE	Milwaukee General Mitchell Intl Apt	BNA	Nashville	62	201807
WN	Southwest Airlines	MKE	Milwaukee General Mitchell Intl Apt	BOS	Boston Edward L Logan Intl Apt	51	201807
WN	Southwest Airlines	MKE	Milwaukee General Mitchell Intl Apt	BWI	Baltimore Washington International Apt	87	201807
WN	Southwest Airlines	MKE	Milwaukee General Mitchell Intl Apt	CLE	Cleveland Hopkins International Apt	58	201807
WN	Southwest Airlines	MKE	Milwaukee General Mitchell Intl Apt	DEN	Denver Intl Apt	115	201807
WN	Southwest Airlines	MKE	Milwaukee General Mitchell Intl Apt	HOU	Houston William P. Hobby Apt	31	201807
WN	Southwest Airlines	MKE	Milwaukee General Mitchell Intl Apt	LAS	Las Vegas McCarran International Apt	111	201807
WN	Southwest Airlines	MKE	Milwaukee General Mitchell Intl Apt	LAX	Los Angeles International Apt	31	201807
WN	Southwest Airlines	MKE	Milwaukee General Mitchell Intl Apt	MCI	Kansas City International Apt	51	201807
WN	Southwest Airlines	MKE	Milwaukee General Mitchell Intl Apt	MCO	Orlando International Apt	95	201807
WN	Southwest Airlines	MKE	Milwaukee General Mitchell Intl Apt	PHX	Phoenix Sky Harbor Intl Apt	62	201807
WN	Southwest Airlines	MKE	Milwaukee General Mitchell Intl Apt	SAN	San Diego International	31	201807
WN	Southwest Airlines	MKE	Milwaukee General Mitchell Intl Apt	SEA	Seattle-Tacoma International Apt	31	201807
WN	Southwest Airlines	MKE	Milwaukee General Mitchell Intl Apt	SFO	San Francisco	31	201807
WN	Southwest Airlines	MKE	Milwaukee General Mitchell Intl Apt	STL	St Louis Lambert Intl Apt	58	201807
WN	Southwest Airlines	MSP	Minneapolis/St Paul International Apt	ATL	Atlanta Hartsfield-jackson Intl Apt	58	201807
WN	Southwest Airlines	MSP	Minneapolis/St Paul International Apt	BNA	Nashville	31	201807
WN	Southwest Airlines	MSP	Minneapolis/St Paul International Apt	BWI	Baltimore Washington International Apt	62	201807
WN	Southwest Airlines	MSP	Minneapolis/St Paul International Apt	DEN	Denver Intl Apt	149	201807
WN	Southwest Airlines	MSP	Minneapolis/St Paul International Apt	MCI	Kansas City International Apt	54	201807
WN	Southwest Airlines	MSP	Minneapolis/St Paul International Apt	MDW	Chicago Midway Intl	222	201807
WN	Southwest Airlines	MSP	Minneapolis/St Paul International Apt	OAK	Oakland International Apt	17	201807
WN	Southwest Airlines	MSP	Minneapolis/St Paul International Apt	PHX	Phoenix Sky Harbor Intl Apt	62	201807
WN	Southwest Airlines	MSP	Minneapolis/St Paul International Apt	STL	St Louis Lambert Intl Apt	78	201807
WN	Southwest Airlines	MSY	New Orleans Louis Armstrong Intl Apt	ATL	Atlanta Hartsfield-jackson Intl Apt	120	201807
WN	Southwest Airlines	MSY	New Orleans Louis Armstrong Intl Apt	AUS	Austin-Bergstrom International Apt	58	201807
WN	Southwest Airlines	MSY	New Orleans Louis Armstrong Intl Apt	BNA	Nashville	101	201807
WN	Southwest Airlines	MSY	New Orleans Louis Armstrong Intl Apt	BOS	Boston Edward L Logan Intl Apt	4	201807
WN	Southwest Airlines	MSY	New Orleans Louis Armstrong Intl Apt	BWI	Baltimore Washington International Apt	110	201807
WN	Southwest Airlines	MSY	New Orleans Louis Armstrong Intl Apt	CMH	Columbus John Glenn Intl Apt	9	201807
WN	Southwest Airlines	MSY	New Orleans Louis Armstrong Intl Apt	CUN	Cancun	4	201807
WN	Southwest Airlines	MSY	New Orleans Louis Armstrong Intl Apt	DEN	Denver Intl Apt	67	201807
WN	Southwest Airlines	MSY	New Orleans Louis Armstrong Intl Apt	FLL	Fort Lauderdale/Hollywood Intl Apt	66	201807
WN	Southwest Airlines	MSY	New Orleans Louis Armstrong Intl Apt	HOU	Houston William P. Hobby Apt	280	201807
WN	Southwest Airlines	MSY	New Orleans Louis Armstrong Intl Apt	IND	Indianapolis	5	201807
WN	Southwest Airlines	MSY	New Orleans Louis Armstrong Intl Apt	LAS	Las Vegas McCarran International Apt	62	201807
WN	Southwest Airlines	MSY	New Orleans Louis Armstrong Intl Apt	LAX	Los Angeles International Apt	62	201807
WN	Southwest Airlines	MSY	New Orleans Louis Armstrong Intl Apt	MCI	Kansas City International Apt	36	201807
WN	Southwest Airlines	MSY	New Orleans Louis Armstrong Intl Apt	MCO	Orlando International Apt	125	201807
WN	Southwest Airlines	MSY	New Orleans Louis Armstrong Intl Apt	MDW	Chicago Midway Intl	108	201807
WN	Southwest Airlines	MSY	New Orleans Louis Armstrong Intl Apt	OAK	Oakland International Apt	31	201807
WN	Southwest Airlines	MSY	New Orleans Louis Armstrong Intl Apt	PHX	Phoenix Sky Harbor Intl Apt	36	201807
WN	Southwest Airlines	MSY	New Orleans Louis Armstrong Intl Apt	SAN	San Diego International	31	201807
WN	Southwest Airlines	MSY	New Orleans Louis Armstrong Intl Apt	SAT	San Antonio International Apt	36	201807
WN	Southwest Airlines	MSY	New Orleans Louis Armstrong Intl Apt	SJC	San Jose Norman Y. Mineta Intl	5	201807
WN	Southwest Airlines	MSY	New Orleans Louis Armstrong Intl Apt	SMF	Sacramento International Apt	5	201807
WN	Southwest Airlines	MSY	New Orleans Louis Armstrong Intl Apt	STL	St Louis Lambert Intl Apt	64	201807
WN	Southwest Airlines	OAK	Oakland International Apt	ABQ	Albuquerque	84	201807
WN	Southwest Airlines	OAK	Oakland International Apt	ATL	Atlanta Hartsfield-jackson Intl Apt	38	201807
WN	Southwest Airlines	OAK	Oakland International Apt	AUS	Austin-Bergstrom International Apt	31	201807
WN	Southwest Airlines	OAK	Oakland International Apt	BNA	Nashville	31	201807
WN	Southwest Airlines	OAK	Oakland International Apt	BOI	Boise	60	201807
WN	Southwest Airlines	OAK	Oakland International Apt	BWI	Baltimore Washington International Apt	57	201807
WN	Southwest Airlines	OAK	Oakland International Apt	CMH	Columbus John Glenn Intl Apt	31	201807
WN	Southwest Airlines	OAK	Oakland International Apt	DEN	Denver Intl Apt	144	201807
WN	Southwest Airlines	OAK	Oakland International Apt	EWR	Newark Liberty International Apt	31	201807
WN	Southwest Airlines	OAK	Oakland International Apt	HOU	Houston William P. Hobby Apt	62	201807
WN	Southwest Airlines	OAK	Oakland International Apt	IND	Indianapolis	17	201807
WN	Southwest Airlines	OAK	Oakland International Apt	LAS	Las Vegas McCarran International Apt	258	201807
WN	Southwest Airlines	OAK	Oakland International Apt	LAX	Los Angeles International Apt	377	201807
WN	Southwest Airlines	OAK	Oakland International Apt	MCI	Kansas City International Apt	56	201807
WN	Southwest Airlines	OAK	Oakland International Apt	MCO	Orlando International Apt	19	201807
WN	Southwest Airlines	OAK	Oakland International Apt	MDW	Chicago Midway Intl	115	201807
WN	Southwest Airlines	OAK	Oakland International Apt	MSP	Minneapolis/St Paul International Apt	17	201807
WN	Southwest Airlines	OAK	Oakland International Apt	MSY	New Orleans Louis Armstrong Intl Apt	31	201807
WN	Southwest Airlines	OAK	Oakland International Apt	PDX	Portland International	172	201807
WN	Southwest Airlines	OAK	Oakland International Apt	PHX	Phoenix Sky Harbor Intl Apt	165	201807
WN	Southwest Airlines	OAK	Oakland International Apt	RNO	Reno	60	201807
WN	Southwest Airlines	OAK	Oakland International Apt	SAN	San Diego International	347	201807
WN	Southwest Airlines	OAK	Oakland International Apt	SAT	San Antonio International Apt	24	201807
WN	Southwest Airlines	OAK	Oakland International Apt	SEA	Seattle-Tacoma International Apt	201	201807
WN	Southwest Airlines	OAK	Oakland International Apt	SLC	Salt Lake City	82	201807
WN	Southwest Airlines	OAK	Oakland International Apt	STL	St Louis Lambert Intl Apt	31	201807
WN	Southwest Airlines	PDX	Portland International	ABQ	Albuquerque	27	201807
WN	Southwest Airlines	PDX	Portland International	AUS	Austin-Bergstrom International Apt	27	201807
WN	Southwest Airlines	PDX	Portland International	BWI	Baltimore Washington International Apt	31	201807
WN	Southwest Airlines	PDX	Portland International	DEN	Denver Intl Apt	125	201807
WN	Southwest Airlines	PDX	Portland International	HOU	Houston William P. Hobby Apt	31	201807
WN	Southwest Airlines	PDX	Portland International	LAS	Las Vegas McCarran International Apt	127	201807
WN	Southwest Airlines	PDX	Portland International	LAX	Los Angeles International Apt	58	201807
WN	Southwest Airlines	PDX	Portland International	MCI	Kansas City International Apt	32	201807
WN	Southwest Airlines	PDX	Portland International	MDW	Chicago Midway Intl	88	201807
WN	Southwest Airlines	PDX	Portland International	OAK	Oakland International Apt	172	201807
WN	Southwest Airlines	PDX	Portland International	PHX	Phoenix Sky Harbor Intl Apt	119	201807
WN	Southwest Airlines	PDX	Portland International	SAN	San Diego International	84	201807
WN	Southwest Airlines	PDX	Portland International	SFO	San Francisco	87	201807
WN	Southwest Airlines	PDX	Portland International	SJC	San Jose Norman Y. Mineta Intl	161	201807
WN	Southwest Airlines	PDX	Portland International	SMF	Sacramento International Apt	140	201807
WN	Southwest Airlines	PDX	Portland International	STL	St Louis Lambert Intl Apt	31	201807
WN	Southwest Airlines	PHL	Philadelphia International Apt	ATL	Atlanta Hartsfield-jackson Intl Apt	85	201807
WN	Southwest Airlines	PHL	Philadelphia International Apt	BNA	Nashville	67	201807
WN	Southwest Airlines	PHL	Philadelphia International Apt	DEN	Denver Intl Apt	66	201807
WN	Southwest Airlines	PHL	Philadelphia International Apt	FLL	Fort Lauderdale/Hollywood Intl Apt	31	201807
WN	Southwest Airlines	PHL	Philadelphia International Apt	LAS	Las Vegas McCarran International Apt	31	201807
WN	Southwest Airlines	PHL	Philadelphia International Apt	MCO	Orlando International Apt	101	201807
WN	Southwest Airlines	PHL	Philadelphia International Apt	MDW	Chicago Midway Intl	180	201807
WN	Southwest Airlines	PHL	Philadelphia International Apt	PHX	Phoenix Sky Harbor Intl Apt	35	201807
WN	Southwest Airlines	PHL	Philadelphia International Apt	STL	St Louis Lambert Intl Apt	67	201807
WN	Southwest Airlines	PHX	Phoenix Sky Harbor Intl Apt	ABQ	Albuquerque	174	201807
WN	Southwest Airlines	PHX	Phoenix Sky Harbor Intl Apt	ATL	Atlanta Hartsfield-jackson Intl Apt	58	201807
WN	Southwest Airlines	PHX	Phoenix Sky Harbor Intl Apt	AUS	Austin-Bergstrom International Apt	118	201807
WN	Southwest Airlines	PHX	Phoenix Sky Harbor Intl Apt	BNA	Nashville	96	201807
WN	Southwest Airlines	PHX	Phoenix Sky Harbor Intl Apt	BOI	Boise	31	201807
WN	Southwest Airlines	PHX	Phoenix Sky Harbor Intl Apt	BWI	Baltimore Washington International Apt	91	201807
WN	Southwest Airlines	PHX	Phoenix Sky Harbor Intl Apt	CLE	Cleveland Hopkins International Apt	31	201807
WN	Southwest Airlines	PHX	Phoenix Sky Harbor Intl Apt	CMH	Columbus John Glenn Intl Apt	51	201807
WN	Southwest Airlines	PHX	Phoenix Sky Harbor Intl Apt	DEN	Denver Intl Apt	279	201807
WN	Southwest Airlines	PHX	Phoenix Sky Harbor Intl Apt	DTW	Detroit Metropolitan Wayne County	57	201807
WN	Southwest Airlines	PHX	Phoenix Sky Harbor Intl Apt	ELP	El Paso International Apt	109	201807
WN	Southwest Airlines	PHX	Phoenix Sky Harbor Intl Apt	EWR	Newark Liberty International Apt	31	201807
WN	Southwest Airlines	PHX	Phoenix Sky Harbor Intl Apt	FLL	Fort Lauderdale/Hollywood Intl Apt	31	201807
WN	Southwest Airlines	PHX	Phoenix Sky Harbor Intl Apt	HOU	Houston William P. Hobby Apt	144	201807
WN	Southwest Airlines	PHX	Phoenix Sky Harbor Intl Apt	IND	Indianapolis	60	201807
WN	Southwest Airlines	PHX	Phoenix Sky Harbor Intl Apt	LAS	Las Vegas McCarran International Apt	307	201807
WN	Southwest Airlines	PHX	Phoenix Sky Harbor Intl Apt	LAX	Los Angeles International Apt	260	201807
WN	Southwest Airlines	PHX	Phoenix Sky Harbor Intl Apt	MCI	Kansas City International Apt	93	201807
WN	Southwest Airlines	PHX	Phoenix Sky Harbor Intl Apt	MCO	Orlando International Apt	44	201807
WN	Southwest Airlines	PHX	Phoenix Sky Harbor Intl Apt	MDW	Chicago Midway Intl	220	201807
WN	Southwest Airlines	PHX	Phoenix Sky Harbor Intl Apt	MKE	Milwaukee General Mitchell Intl Apt	62	201807
WN	Southwest Airlines	PHX	Phoenix Sky Harbor Intl Apt	MSP	Minneapolis/St Paul International Apt	62	201807
WN	Southwest Airlines	PHX	Phoenix Sky Harbor Intl Apt	MSY	New Orleans Louis Armstrong Intl Apt	36	201807
WN	Southwest Airlines	PHX	Phoenix Sky Harbor Intl Apt	OAK	Oakland International Apt	165	201807
WN	Southwest Airlines	PHX	Phoenix Sky Harbor Intl Apt	PDX	Portland International	119	201807
WN	Southwest Airlines	PHX	Phoenix Sky Harbor Intl Apt	PHL	Philadelphia International Apt	35	201807
WN	Southwest Airlines	PHX	Phoenix Sky Harbor Intl Apt	RNO	Reno	62	201807
WN	Southwest Airlines	PHX	Phoenix Sky Harbor Intl Apt	SAN	San Diego International	298	201807
WN	Southwest Airlines	PHX	Phoenix Sky Harbor Intl Apt	SAT	San Antonio International Apt	93	201807
WN	Southwest Airlines	PHX	Phoenix Sky Harbor Intl Apt	SEA	Seattle-Tacoma International Apt	122	201807
WN	Southwest Airlines	PHX	Phoenix Sky Harbor Intl Apt	SFO	San Francisco	142	201807
WN	Southwest Airlines	PHX	Phoenix Sky Harbor Intl Apt	SJC	San Jose Norman Y. Mineta Intl	167	201807
WN	Southwest Airlines	PHX	Phoenix Sky Harbor Intl Apt	SLC	Salt Lake City	173	201807
WN	Southwest Airlines	PHX	Phoenix Sky Harbor Intl Apt	SMF	Sacramento International Apt	151	201807
WN	Southwest Airlines	PHX	Phoenix Sky Harbor Intl Apt	STL	St Louis Lambert Intl Apt	96	201807
WN	Southwest Airlines	PHX	Phoenix Sky Harbor Intl Apt	TUL	Tulsa International Apt	60	201807
WN	Southwest Airlines	RNO	Reno	DEN	Denver Intl Apt	67	201807
WN	Southwest Airlines	RNO	Reno	LAS	Las Vegas McCarran International Apt	287	201807
WN	Southwest Airlines	RNO	Reno	LAX	Los Angeles International Apt	82	201807
WN	Southwest Airlines	RNO	Reno	MDW	Chicago Midway Intl	35	201807
WN	Southwest Airlines	RNO	Reno	OAK	Oakland International Apt	60	201807
WN	Southwest Airlines	RNO	Reno	PHX	Phoenix Sky Harbor Intl Apt	62	201807
WN	Southwest Airlines	RNO	Reno	SAN	San Diego International	65	201807
WN	Southwest Airlines	RNO	Reno	SJC	San Jose Norman Y. Mineta Intl	31	201807
WN	Southwest Airlines	SAN	San Diego International	ABQ	Albuquerque	62	201807
WN	Southwest Airlines	SAN	San Diego International	ATL	Atlanta Hartsfield-jackson Intl Apt	31	201807
WN	Southwest Airlines	SAN	San Diego International	AUS	Austin-Bergstrom International Apt	84	201807
WN	Southwest Airlines	SAN	San Diego International	BNA	Nashville	62	201807
WN	Southwest Airlines	SAN	San Diego International	BOI	Boise	31	201807
WN	Southwest Airlines	SAN	San Diego International	BWI	Baltimore Washington International Apt	93	201807
WN	Southwest Airlines	SAN	San Diego International	DEN	Denver Intl Apt	184	201807
WN	Southwest Airlines	SAN	San Diego International	ELP	El Paso International Apt	5	201807
WN	Southwest Airlines	SAN	San Diego International	EWR	Newark Liberty International Apt	31	201807
WN	Southwest Airlines	SAN	San Diego International	HOU	Houston William P. Hobby Apt	66	201807
WN	Southwest Airlines	SAN	San Diego International	IND	Indianapolis	31	201807
WN	Southwest Airlines	SAN	San Diego International	LAS	Las Vegas McCarran International Apt	320	201807
WN	Southwest Airlines	SAN	San Diego International	MCI	Kansas City International Apt	58	201807
WN	Southwest Airlines	SAN	San Diego International	MCO	Orlando International Apt	31	201807
WN	Southwest Airlines	SAN	San Diego International	MDW	Chicago Midway Intl	124	201807
WN	Southwest Airlines	SAN	San Diego International	MKE	Milwaukee General Mitchell Intl Apt	31	201807
WN	Southwest Airlines	SAN	San Diego International	MSY	New Orleans Louis Armstrong Intl Apt	31	201807
WN	Southwest Airlines	SAN	San Diego International	OAK	Oakland International Apt	349	201807
WN	Southwest Airlines	SAN	San Diego International	PDX	Portland International	82	201807
WN	Southwest Airlines	SAN	San Diego International	PHX	Phoenix Sky Harbor Intl Apt	300	201807
WN	Southwest Airlines	SAN	San Diego International	RNO	Reno	67	201807
WN	Southwest Airlines	SAN	San Diego International	SAT	San Antonio International Apt	62	201807
WN	Southwest Airlines	SAN	San Diego International	SEA	Seattle-Tacoma International Apt	62	201807
WN	Southwest Airlines	SAN	San Diego International	SFO	San Francisco	232	201807
WN	Southwest Airlines	SAN	San Diego International	SJC	San Jose Norman Y. Mineta Intl	349	201807
WN	Southwest Airlines	SAN	San Diego International	SLC	Salt Lake City	31	201807
WN	Southwest Airlines	SAN	San Diego International	SMF	Sacramento International Apt	328	201807
WN	Southwest Airlines	SAN	San Diego International	STL	St Louis Lambert Intl Apt	66	201807
WN	Southwest Airlines	SAN	San Diego International	TUS	Tucson International Apt	58	201807
WN	Southwest Airlines	SAT	San Antonio International Apt	ATL	Atlanta Hartsfield-jackson Intl Apt	62	201807
WN	Southwest Airlines	SAT	San Antonio International Apt	BNA	Nashville	62	201807
WN	Southwest Airlines	SAT	San Antonio International Apt	BWI	Baltimore Washington International Apt	87	201807
WN	Southwest Airlines	SAT	San Antonio International Apt	CUN	Cancun	32	201807
WN	Southwest Airlines	SAT	San Antonio International Apt	DEN	Denver Intl Apt	93	201807
WN	Southwest Airlines	SAT	San Antonio International Apt	ELP	El Paso International Apt	87	201807
WN	Southwest Airlines	SAT	San Antonio International Apt	FLL	Fort Lauderdale/Hollywood Intl Apt	24	201807
WN	Southwest Airlines	SAT	San Antonio International Apt	HOU	Houston William P. Hobby Apt	153	201807
WN	Southwest Airlines	SAT	San Antonio International Apt	LAS	Las Vegas McCarran International Apt	122	201807
WN	Southwest Airlines	SAT	San Antonio International Apt	LAX	Los Angeles International Apt	62	201807
WN	Southwest Airlines	SAT	San Antonio International Apt	MCI	Kansas City International Apt	32	201807
WN	Southwest Airlines	SAT	San Antonio International Apt	MCO	Orlando International Apt	68	201807
WN	Southwest Airlines	SAT	San Antonio International Apt	MDW	Chicago Midway Intl	89	201807
WN	Southwest Airlines	SAT	San Antonio International Apt	MSY	New Orleans Louis Armstrong Intl Apt	36	201807
WN	Southwest Airlines	SAT	San Antonio International Apt	OAK	Oakland International Apt	24	201807
WN	Southwest Airlines	SAT	San Antonio International Apt	PHX	Phoenix Sky Harbor Intl Apt	93	201807
WN	Southwest Airlines	SAT	San Antonio International Apt	SAN	San Diego International	62	201807
WN	Southwest Airlines	SAT	San Antonio International Apt	STL	St Louis Lambert Intl Apt	62	201807
WN	Southwest Airlines	SEA	Seattle-Tacoma International Apt	BNA	Nashville	31	201807
WN	Southwest Airlines	SEA	Seattle-Tacoma International Apt	BWI	Baltimore Washington International Apt	31	201807
WN	Southwest Airlines	SEA	Seattle-Tacoma International Apt	DEN	Denver Intl Apt	144	201807
WN	Southwest Airlines	SEA	Seattle-Tacoma International Apt	HOU	Houston William P. Hobby Apt	31	201807
WN	Southwest Airlines	SEA	Seattle-Tacoma International Apt	LAS	Las Vegas McCarran International Apt	87	201807
WN	Southwest Airlines	SEA	Seattle-Tacoma International Apt	MCI	Kansas City International Apt	31	201807
WN	Southwest Airlines	SEA	Seattle-Tacoma International Apt	MDW	Chicago Midway Intl	145	201807
WN	Southwest Airlines	SEA	Seattle-Tacoma International Apt	MKE	Milwaukee General Mitchell Intl Apt	31	201807
WN	Southwest Airlines	SEA	Seattle-Tacoma International Apt	OAK	Oakland International Apt	201	201807
WN	Southwest Airlines	SEA	Seattle-Tacoma International Apt	PHX	Phoenix Sky Harbor Intl Apt	124	201807
WN	Southwest Airlines	SEA	Seattle-Tacoma International Apt	SAN	San Diego International	62	201807
WN	Southwest Airlines	SEA	Seattle-Tacoma International Apt	SJC	San Jose Norman Y. Mineta Intl	135	201807
WN	Southwest Airlines	SEA	Seattle-Tacoma International Apt	SMF	Sacramento International Apt	164	201807
WN	Southwest Airlines	SEA	Seattle-Tacoma International Apt	STL	St Louis Lambert Intl Apt	33	201807
WN	Southwest Airlines	SFO	San Francisco	AUS	Austin-Bergstrom International Apt	31	201807
WN	Southwest Airlines	SFO	San Francisco	DEN	Denver Intl Apt	141	201807
WN	Southwest Airlines	SFO	San Francisco	LAS	Las Vegas McCarran International Apt	191	201807
WN	Southwest Airlines	SFO	San Francisco	LAX	Los Angeles International Apt	261	201807
WN	Southwest Airlines	SFO	San Francisco	MDW	Chicago Midway Intl	88	201807
WN	Southwest Airlines	SFO	San Francisco	MKE	Milwaukee General Mitchell Intl Apt	31	201807
WN	Southwest Airlines	SFO	San Francisco	PDX	Portland International	87	201807
WN	Southwest Airlines	SFO	San Francisco	PHX	Phoenix Sky Harbor Intl Apt	140	201807
WN	Southwest Airlines	SFO	San Francisco	SAN	San Diego International	234	201807
WN	Southwest Airlines	SFO	San Francisco	STL	St Louis Lambert Intl Apt	31	201807
WN	Southwest Airlines	SJC	San Jose Norman Y. Mineta Intl	ABQ	Albuquerque	5	201807
WN	Southwest Airlines	SJC	San Jose Norman Y. Mineta Intl	AUS	Austin-Bergstrom International Apt	74	201807
WN	Southwest Airlines	SJC	San Jose Norman Y. Mineta Intl	BOI	Boise	31	201807
WN	Southwest Airlines	SJC	San Jose Norman Y. Mineta Intl	BWI	Baltimore Washington International Apt	31	201807
WN	Southwest Airlines	SJC	San Jose Norman Y. Mineta Intl	DEN	Denver Intl Apt	120	201807
WN	Southwest Airlines	SJC	San Jose Norman Y. Mineta Intl	HOU	Houston William P. Hobby Apt	31	201807
WN	Southwest Airlines	SJC	San Jose Norman Y. Mineta Intl	LAS	Las Vegas McCarran International Apt	259	201807
WN	Southwest Airlines	SJC	San Jose Norman Y. Mineta Intl	LAX	Los Angeles International Apt	314	201807
WN	Southwest Airlines	SJC	San Jose Norman Y. Mineta Intl	MCO	Orlando International Apt	31	201807
WN	Southwest Airlines	SJC	San Jose Norman Y. Mineta Intl	MDW	Chicago Midway Intl	53	201807
WN	Southwest Airlines	SJC	San Jose Norman Y. Mineta Intl	MSY	New Orleans Louis Armstrong Intl Apt	5	201807
WN	Southwest Airlines	SJC	San Jose Norman Y. Mineta Intl	PDX	Portland International	161	201807
WN	Southwest Airlines	SJC	San Jose Norman Y. Mineta Intl	PHX	Phoenix Sky Harbor Intl Apt	167	201807
WN	Southwest Airlines	SJC	San Jose Norman Y. Mineta Intl	RNO	Reno	31	201807
WN	Southwest Airlines	SJC	San Jose Norman Y. Mineta Intl	SAN	San Diego International	351	201807
WN	Southwest Airlines	SJC	San Jose Norman Y. Mineta Intl	SEA	Seattle-Tacoma International Apt	135	201807
WN	Southwest Airlines	SJC	San Jose Norman Y. Mineta Intl	SLC	Salt Lake City	51	201807
WN	Southwest Airlines	SJC	San Jose Norman Y. Mineta Intl	STL	St Louis Lambert Intl Apt	31	201807
WN	Southwest Airlines	SLC	Salt Lake City	BWI	Baltimore Washington International Apt	57	201807
WN	Southwest Airlines	SLC	Salt Lake City	DEN	Denver Intl Apt	169	201807
WN	Southwest Airlines	SLC	Salt Lake City	HOU	Houston William P. Hobby Apt	4	201807
WN	Southwest Airlines	SLC	Salt Lake City	LAS	Las Vegas McCarran International Apt	141	201807
WN	Southwest Airlines	SLC	Salt Lake City	LAX	Los Angeles International Apt	82	201807
WN	Southwest Airlines	SLC	Salt Lake City	MDW	Chicago Midway Intl	62	201807
WN	Southwest Airlines	SLC	Salt Lake City	OAK	Oakland International Apt	82	201807
WN	Southwest Airlines	SLC	Salt Lake City	PHX	Phoenix Sky Harbor Intl Apt	173	201807
WN	Southwest Airlines	SLC	Salt Lake City	SAN	San Diego International	31	201807
WN	Southwest Airlines	SLC	Salt Lake City	SJC	San Jose Norman Y. Mineta Intl	51	201807
WN	Southwest Airlines	SLC	Salt Lake City	SMF	Sacramento International Apt	31	201807
WN	Southwest Airlines	SMF	Sacramento International Apt	AUS	Austin-Bergstrom International Apt	31	201807
WN	Southwest Airlines	SMF	Sacramento International Apt	BOI	Boise	31	201807
WN	Southwest Airlines	SMF	Sacramento International Apt	BWI	Baltimore Washington International Apt	31	201807
WN	Southwest Airlines	SMF	Sacramento International Apt	DEN	Denver Intl Apt	146	201807
WN	Southwest Airlines	SMF	Sacramento International Apt	LAS	Las Vegas McCarran International Apt	239	201807
WN	Southwest Airlines	SMF	Sacramento International Apt	LAX	Los Angeles International Apt	250	201807
WN	Southwest Airlines	SMF	Sacramento International Apt	MCO	Orlando International Apt	31	201807
WN	Southwest Airlines	SMF	Sacramento International Apt	MDW	Chicago Midway Intl	61	201807
WN	Southwest Airlines	SMF	Sacramento International Apt	MSY	New Orleans Louis Armstrong Intl Apt	5	201807
WN	Southwest Airlines	SMF	Sacramento International Apt	PDX	Portland International	140	201807
WN	Southwest Airlines	SMF	Sacramento International Apt	PHX	Phoenix Sky Harbor Intl Apt	149	201807
WN	Southwest Airlines	SMF	Sacramento International Apt	SAN	San Diego International	328	201807
WN	Southwest Airlines	SMF	Sacramento International Apt	SEA	Seattle-Tacoma International Apt	164	201807
WN	Southwest Airlines	SMF	Sacramento International Apt	SLC	Salt Lake City	31	201807
WN	Southwest Airlines	SMF	Sacramento International Apt	STL	St Louis Lambert Intl Apt	31	201807
WN	Southwest Airlines	STL	St Louis Lambert Intl Apt	ATL	Atlanta Hartsfield-jackson Intl Apt	116	201807
WN	Southwest Airlines	STL	St Louis Lambert Intl Apt	AUS	Austin-Bergstrom International Apt	54	201807
WN	Southwest Airlines	STL	St Louis Lambert Intl Apt	BNA	Nashville	87	201807
WN	Southwest Airlines	STL	St Louis Lambert Intl Apt	BOS	Boston Edward L Logan Intl Apt	107	201807
WN	Southwest Airlines	STL	St Louis Lambert Intl Apt	BWI	Baltimore Washington International Apt	129	201807
WN	Southwest Airlines	STL	St Louis Lambert Intl Apt	CLE	Cleveland Hopkins International Apt	65	201807
WN	Southwest Airlines	STL	St Louis Lambert Intl Apt	CMH	Columbus John Glenn Intl Apt	58	201807
WN	Southwest Airlines	STL	St Louis Lambert Intl Apt	CUN	Cancun	4	201807
WN	Southwest Airlines	STL	St Louis Lambert Intl Apt	DEN	Denver Intl Apt	158	201807
WN	Southwest Airlines	STL	St Louis Lambert Intl Apt	DTW	Detroit Metropolitan Wayne County	63	201807
WN	Southwest Airlines	STL	St Louis Lambert Intl Apt	EWR	Newark Liberty International Apt	62	201807
WN	Southwest Airlines	STL	St Louis Lambert Intl Apt	FLL	Fort Lauderdale/Hollywood Intl Apt	64	201807
WN	Southwest Airlines	STL	St Louis Lambert Intl Apt	HOU	Houston William P. Hobby Apt	118	201807
WN	Southwest Airlines	STL	St Louis Lambert Intl Apt	LAS	Las Vegas McCarran International Apt	123	201807
WN	Southwest Airlines	STL	St Louis Lambert Intl Apt	LAX	Los Angeles International Apt	93	201807
WN	Southwest Airlines	STL	St Louis Lambert Intl Apt	MCI	Kansas City International Apt	109	201807
WN	Southwest Airlines	STL	St Louis Lambert Intl Apt	MCO	Orlando International Apt	137	201807
WN	Southwest Airlines	STL	St Louis Lambert Intl Apt	MDW	Chicago Midway Intl	218	201807
WN	Southwest Airlines	STL	St Louis Lambert Intl Apt	MKE	Milwaukee General Mitchell Intl Apt	58	201807
WN	Southwest Airlines	STL	St Louis Lambert Intl Apt	MSP	Minneapolis/St Paul International Apt	81	201807
WN	Southwest Airlines	STL	St Louis Lambert Intl Apt	MSY	New Orleans Louis Armstrong Intl Apt	64	201807
WN	Southwest Airlines	STL	St Louis Lambert Intl Apt	OAK	Oakland International Apt	31	201807
WN	Southwest Airlines	STL	St Louis Lambert Intl Apt	PDX	Portland International	31	201807
WN	Southwest Airlines	STL	St Louis Lambert Intl Apt	PHL	Philadelphia International Apt	67	201807
WN	Southwest Airlines	STL	St Louis Lambert Intl Apt	PHX	Phoenix Sky Harbor Intl Apt	94	201807
WN	Southwest Airlines	STL	St Louis Lambert Intl Apt	SAN	San Diego International	66	201807
WN	Southwest Airlines	STL	St Louis Lambert Intl Apt	SAT	San Antonio International Apt	62	201807
WN	Southwest Airlines	STL	St Louis Lambert Intl Apt	SEA	Seattle-Tacoma International Apt	33	201807
WN	Southwest Airlines	STL	St Louis Lambert Intl Apt	SFO	San Francisco	31	201807
WN	Southwest Airlines	STL	St Louis Lambert Intl Apt	SJC	San Jose Norman Y. Mineta Intl	31	201807
WN	Southwest Airlines	STL	St Louis Lambert Intl Apt	SMF	Sacramento International Apt	31	201807
WN	Southwest Airlines	STL	St Louis Lambert Intl Apt	TUL	Tulsa International Apt	58	201807
WN	Southwest Airlines	TUL	Tulsa International Apt	DEN	Denver Intl Apt	62	201807
WN	Southwest Airlines	TUL	Tulsa International Apt	HOU	Houston William P. Hobby Apt	87	201807
WN	Southwest Airlines	TUL	Tulsa International Apt	LAS	Las Vegas McCarran International Apt	31	201807
WN	Southwest Airlines	TUL	Tulsa International Apt	MCO	Orlando International Apt	4	201807
WN	Southwest Airlines	TUL	Tulsa International Apt	PHX	Phoenix Sky Harbor Intl Apt	60	201807
WN	Southwest Airlines	TUL	Tulsa International Apt	STL	St Louis Lambert Intl Apt	56	201807
WN	Southwest Airlines	TUS	Tucson International Apt	DEN	Denver Intl Apt	62	201807
WN	Southwest Airlines	TUS	Tucson International Apt	LAS	Las Vegas McCarran International Apt	89	201807
WN	Southwest Airlines	TUS	Tucson International Apt	LAX	Los Angeles International Apt	82	201807
WN	Southwest Airlines	TUS	Tucson International Apt	MDW	Chicago Midway Intl	31	201807
WN	Southwest Airlines	TUS	Tucson International Apt	SAN	San Diego International	58	201807
Data copyright 2019. OAG Aviation Worldwide Ltd. All right reserved.
USAGE: 772 RECORDS.
